# Supplementary material for: Trends and country-level variation in age at first sex in sub-Saharan Africa among birth cohorts entering adulthood between 1985 and 2020
Source: PubMed Central journal article supplement (PMC9167540; doi:10.1186/s12889-022-13451-y), 2022-06-04
Supplement: 12889_2022_13451_MOESM1_ESM.pdf [file 12889_2022_13451_MOESM1_ESM.pdf]

**Supplemental Materials:**

**Trends and country-level variation in age at first sex in sub-Saharan Africa among birth cohorts entering adulthood between 1985 and 2020**

Van K inh Nguyen PhD<sup>1</sup>, Jeffrey W Eaton PhD<sup>1</sup>

<sup>1</sup> MRC Centre for Global Infectious Disease Analysis, School of Public Health, Imperial College London, London, United Kingdom

Corresponding author:

Van K inh Nguyen  
MRC Centre for Global Infectious Disease Analysis, School of Public Health  
Imperial College London  
St. Mary’s Hospital Campus  
Norfolk Place  
London  
W2 1PG  
k.nguyen@imperial.ac.uk

Conflicts of Interest: There are no conflict of interests  
Keywords: sexual debut, age at first sex, sub-Saharan Africa

**Table of contents**

Table of contents ..... 1

Supplemental Text 1. Model of age at first sex distribution. ....2

Supplemental Figure 1. Estimated AFS’s shape and skewness parameters .....7

Supplemental Figure 2. Percentage of ever had sex under age 15 .....7

Supplemental table 1. Survey data characteristics.....8

Supplemental table 2. Proportion ever had sex by country, sex, and year of birth..... 18

Supplemental table 3. Parameter estimates by country and sex.....22

Supplemental table 4. ISO A3 and country names.....24

### Supplemental Text S1. Model of age at first sex distribution.

Let  $T_i, i = 1, \dots, n$  the AFS of individual  $i$ , and  $d_i = 1$  the indicator of a reported AFS; those who answered never had a sexual intercourse were assumed right censored with  $d_i = 0$ , that is the individual will eventually have sex at one point in the future; discarding these data will result in lost of valuable information on the time remaining virgin. In these cases,  $T_i$  was the age of the individual at the date of interview. We interpreted the reported AFS as the completed year after the last birthday. Thus, reported AFS was not treated as exact records but only represent an interval surrounding the true AFS, i.e.,  $P(T_i \leq T_i \leq T_i + 1)$ . This can be described by an interval censored survival model with the likelihood reads as

$$l(\boldsymbol{\theta}|\mathbf{T}, \mathbf{d}) \propto \prod_{i:d_i=1} w_i^* [S(T_i) - S(T_i + 1)] \prod_{i:d_i=0} w_i^* S(T_i),$$

in which  $f(\cdot)$  the probability density function (pdf), and  $S(\cdot)$  the survival function of a selected distribution for AFS. The likelihood is weighted by the inverse selection probability from the survey sampling design  $\mathbf{w}^*$ ; here, the weight for observation  $i$  in survey  $k$  was scaled as  $w_{ik}^* = w_{ik} n_k / \sum_i w_{ik}$  such that the weights sum to the total sample size  $n_k$  of each survey.

To allow nonmonotonic hazard function for the sexual debut rate by age and allow for possible skewness in the data, the log of AFS,  $\log(x)$ , was assumed to follow a skew-logistic distribution, which we have shown elsewhere to be a more appropriate representation of the AFS distribution than other common survival distributions (Nguyen and Eaton 2021). The log-skew-logistic distribution was defined by the probability density function

$$f(x) = \gamma p \exp(\mu - x) (1 + \exp(p(\mu - x)))^{-\gamma-1}$$

and cumulative distribution

$$F(x) = [1 + \exp(p(\mu - x))]^{-\gamma}.$$

The parameters  $\mu, p > 0, \gamma > 0$  determine the scale, shape, and skewness of the distribution, respectively; the distribution reduces to a logistic distribution when  $\gamma = 1$ . Illustration of the density distribution can be found in Figure 1.

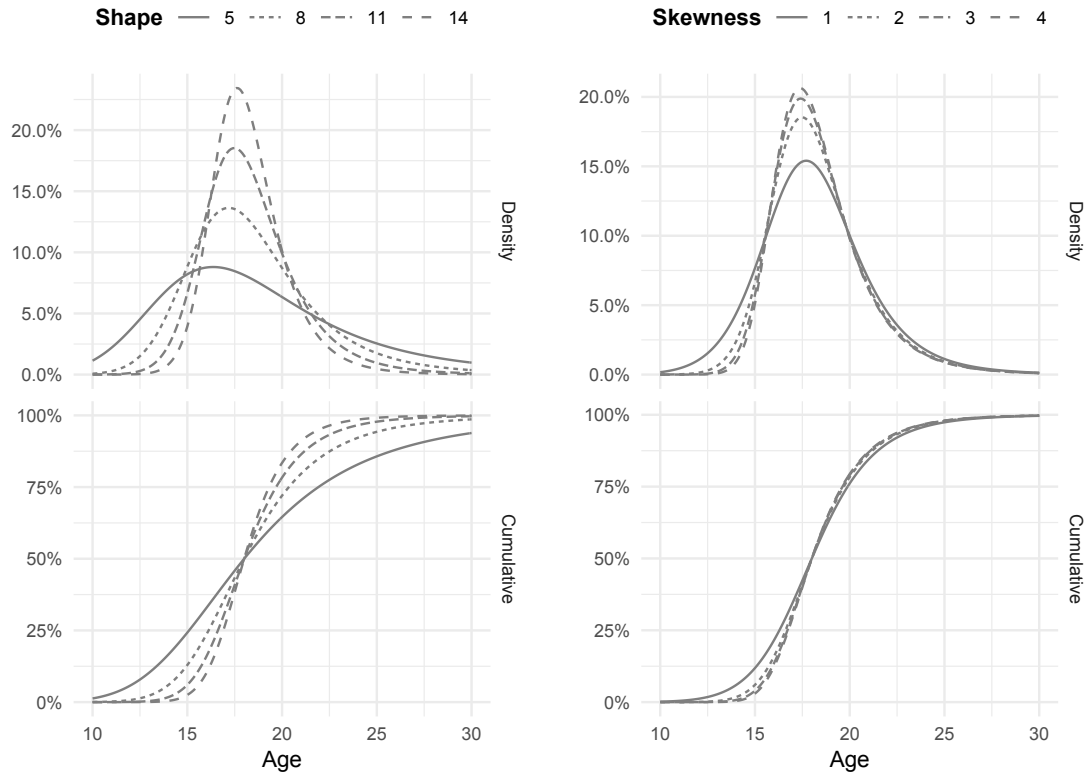

Figure 1. Illustration of the density (top) and cumulative distribution function (bottom) for the skew log-logistic distribution with different shape and skewness parameters. All parameters correspond to a median age at first sex of 18 years. A skewness value of one equal to no skewness and is the same as the logistic distribution. The density and cumulative panel on the right illustrate the relative effect of changing the respective parameter on the distribution while keeping other parameters fixed (skewness=2 and shape=11 for the shape and skewness variation, respectively; the scale parameter was solved to have the same median at eighteen for comparison).

Parameterize the model's linear predictor as  $\mu = -\log(\lambda) = -\mathbf{X}\boldsymbol{\beta}$  and perform a change of variable to  $T$ , the reported AFS, we have

$$S(T) = 1 - (1 + (\lambda T)^{-p})^{-\gamma}$$

and

$$f(T) = T^{-1}\gamma p(\lambda T)^{-p}(1 + (\lambda T)^{-p})^{-\gamma-1};$$

these two were used to evaluate the model likelihood.

The 'hazard' of having sexual debut at age  $T$  is

$$h(T) = -\partial \ln S(T) / \partial T = -T^{-1}\gamma p((1 + (\lambda T)^p)((1 + (\lambda T)^{-p})^{-\gamma}) - 1)^{-1}$$

and the median is

$$\lambda^{-1}(2^{\gamma-1} - 1)^{-p^{-1}}.$$

The distribution IQR can be computed using the quantile function defined as

$$AFS = \frac{1}{\lambda} (Q^{-\gamma^{-1}} - 1)^{-p^{-1}}$$

where Q the quantile of interest.

The model was fitted separately by sex but simultaneously for all countries. For each country  $c, c = 1, \dots, C$ , the shape and skewness parameters  $p_c, \gamma_c$  were estimated independently. The linear predictor was modelled on the scale parameter  $\mu = -\log(\lambda) = -\mathbf{X}\boldsymbol{\beta}$ . This was log-link to the model's linear predictor and was formulated as

$$\eta_{cta} = \beta_0 + \theta_c + \alpha_t + \delta_{ct} + \phi_a + \omega_{ca}$$

where  $\beta_0$  the intercept,  $\theta_c, \alpha_t, \delta_{ct}, \phi_a, \omega_{ca}$  are the spatial, birth cohort, country-birth cohort interaction, age at report effect, country-age interaction each has its corresponding precision parameter  $\tau$ . The birth cohort and age at report main effects were structured as a second-order autoregressive (AR2) models and a first-order random walk (RW1) for which we prefer a smoother variation of trend compared to a more flexible age at report bias. The Intrinsic Conditional Auto-Regressive (ICAR) (Besag and Kooperberg 1995) was used to model the spatial effect on the distribution's shape parameter; its density defined as

$$\pi(\theta_c | \tau_c) \propto \exp\left(0.5\tau_c \sum_{i \sim i'} (\theta_i - \theta_{i'})^2\right),$$

where  $i \sim i'$  denotes all the  $i'$  neighbours of the location  $i$ . We assumed interactions that allow the temporal trend and age effect to vary independently between countries. These interactions were required to address our primary research question of whether trends in AFS were different across countries, allowing for potentially differential reporting biases across countries and between sexes. The space-time prior density was defined using a separable density between and IID and AR2 for country-birth cohort interaction and IID and RW1 for country-age at report bias interaction, each having their own correlation parameter vector (for the AR2 dimension) and precision parameter (for the RW1 dimension).

Sum to zero constraints were imposed on each of the main random effect parameters,  $\sum \theta_c = \sum \alpha_t = \sum \phi_a = 0$ . On the interaction terms, additional sum to zero constraints were put on the direction of birth cohort and age for each country in order to estimate the main

country effect, i.e.,  $\sum_t \delta_{ct} = 0$ ,  $\sum_a \omega_{ca} = 0$ , as well as across countries within each birth cohort and age, i.e.,  $\sum_c \delta_{ct} = \sum_c \omega_{ca} = 0$ . Since several countries (four male datasets and three female datasets) had only one survey with AFS, to estimate age at report effect an additional linear constraint were imposed on the country and age at report interaction. Consequently, while the birth cohort effect was allowed to have different trends among countries, the age at report effect was only allowed to be deviated from the regional trend if they there are more than one survey dataset to inform its pattern.

Priors for all the precision parameters was specified using the penalized-complexity prior (Simpson et al. 2017) with small variances across the hyperparameters, i.e.,  $\tau_c \sim PC(1, 0.01)$ ,  $\tau_a \sim PC(1, 0.01)$ ,  $\tau_p \sim PC(1, 0.01)$ ,  $\tau_\gamma \sim PC(1, 0.01)$ . Based on initial exploration of the distribution parameters, we found that the shape and skewness parameters are highly correlated; thus we used the identified parameter estimates to reparametrize  $\gamma_c^* = \log \gamma_c + 1.1 \log p_c$  and independent informative priors were put on  $\log p_c \sim N(2.2, 0.25)$  and  $\gamma_c^* \sim N(2.8, 0.35)$  such that the priors cover the identified range of the shape and skewness parameters. The main birth cohort AR2 and interaction between birth cohort with country each has two correlation parameters  $\phi$ . To constraint the correlation parameters within their valid region, these parameters were reparametrized using the partial autocorrelation function

$$\psi_i = 2 \times \frac{\exp(\theta_i)}{1 + \exp(\theta_i)} - 1$$

where  $\phi_2 = \psi_2$ ,  $\phi_1 = \psi_1(1 - \phi_2)$ . A multivariate standard normal distribution  $MVN(\mathbf{0}, \mathbf{1})$  was used as prior for the parameters  $\theta$ . Model parameters were estimated with empirical Bayes using Template Model Builder (Kristensen et al. 2016). The code is available at <https://github.com/kklot/dbtmb>.

## References

- Besag, Julian, and Charles Kooperberg. 1995. 'On Conditional and Intrinsic Autoregression'. *Biometrika* 82 (4): 733–46. <https://doi.org/10.2307/2337341>.
- Kristensen, Kasper, Anders Nielsen, Casper W. Berg, Hans Skaug, and Bradley M. Bell. 2016. 'TMB: Automatic Differentiation and Laplace Approximation'. *Journal of Statistical Software* 70. <https://doi.org/10.18637/jss.v070.i05>.
- Nguyen, Van Kinh, and Jeffrey W Eaton. 2021. 'A Model for Reconstructing Trends and Distribution in Age at First Sex from Multiple Household Surveys with Reporting Biases'. *MedRxiv*, January, 2021.12.14.21267770. <https://doi.org/10.1101/2021.12.14.21267770>.
- Simpson, Daniel, Håvard Rue, Andrea Riebler, Thiago G. Martins, and Sigrunn H. Sørbye. 2017. 'Penalising Model Component Complexity: A Principled, Practical Approach to Constructing Priors'. *Statistical Science* 32 (1): 1–28. <https://doi.org/10.1214/16-STS576>.

### Supplemental Figure S1. Estimated AFS's shape and skewness parameters

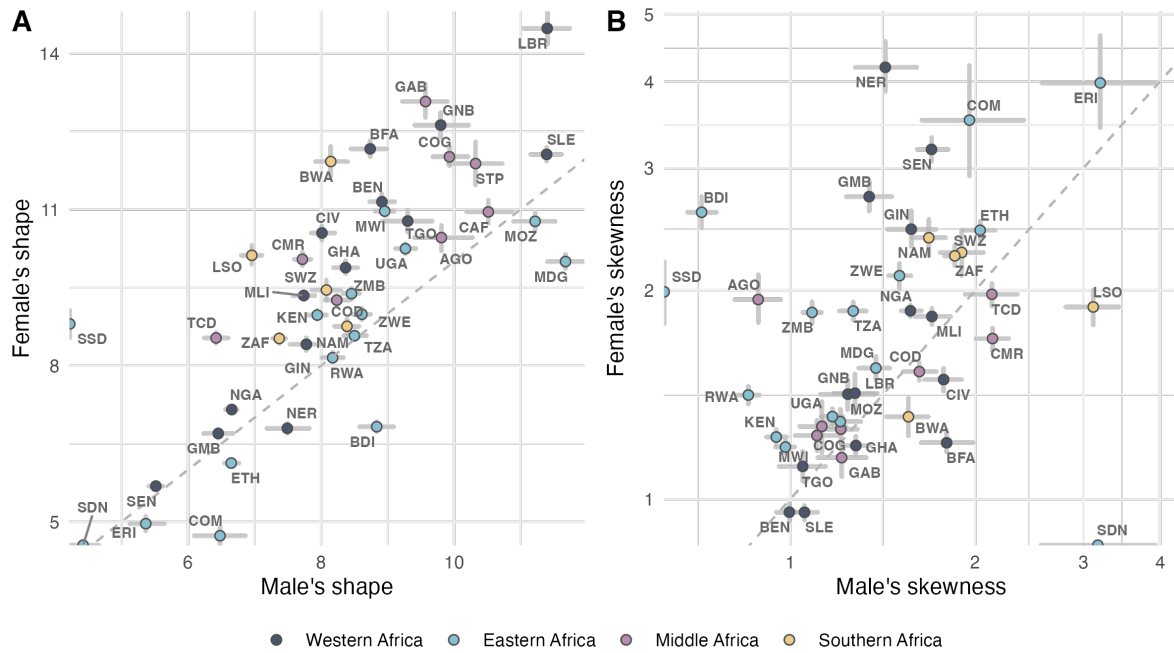

Estimates of the skew logistic shape and skewness parameter by country and sex. The crossed lines in panel A and B show the associated uncertainty interval (UI) in the direction of each axis. Sudan and South-Sudan has only one of the sexes data and are shown with the UI in only one direction and was put arbitrarily on the axes.

### Supplemental Figure S2. Percentage of ever had sex under age 15

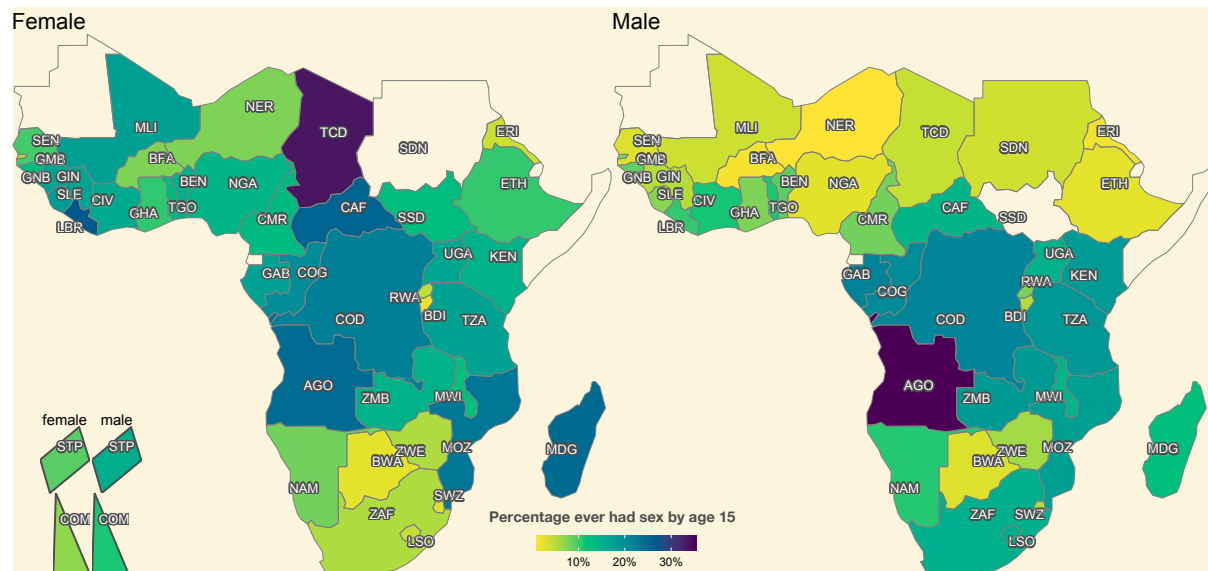

Spatial variation of proportion ever had sex under fifteen of the birth cohort turning age 15 in 2015 in Sub-Saharan Africa. The two countries Comoros and São Tomé & Príncipe are represented in the bottom left. Countries without data are colored the same as the background.

## Supplemental Table S1. Survey data characteristics.

The table reports the total number of respondents in each survey (Sample Size) and the percentage (%) of cases removed due to each exclusion criteria: missing AFS outcome, missing age or date of birth (DOB), AFS > Age, AFS < 7 years.

|        |                                             |
|--------|---------------------------------------------|
| ISO_A3 | : ISO 3166-1 alpha-3 code for countries     |
| AFS    | : Age at first sex                          |
| DHS    | : Demographic and Health Surveys            |
| MICS   | : Multiple Indicators Cluster Surveys       |
| PMA    | : Performance Monitoring and Accountability |
| AIS    | : AIDS Indicators Survey                    |
| PHIA   | : Population-based HIV Impact Assessment    |
| HSRC   | : Human Sciences Research Council           |
| SBS    | : Sexual Behavior Survey                    |
| -      | : Zero or less than 0.05%                   |

The column “Sample size” refers to the count of the data at reading with non-missing and valid coded sex (1 or 2). “Missing AFS” refers to all observations those did not have a record of AFS in the dataset due to either non-answered or ineligibility in the survey’s context (e.g., excluded from the questionnaire’s sexual behaviour module because aged older than 24 in MICS, recorded as “Not applicable” in HSRC), cases flagged as incorrect depending on survey, e.g., in DHS and MICS data, AFS coded as 97 is inconsistent report such that respondent’s AFS exceeds current age, more than one year after the conception of her first child, and others (e.g., don’t know coded as 98) [1]; this also counted the missing data when the missing data was coded as a number, such as 99 in MICS. “Missing age/DOB” refers to cases when year of birth cannot be calculated due to missing both age and time of birth. “Ever sex only” refers to cases answered to have ever had sex, but did not answer a particular age, such as refusing, “don’t know” (coded as 9, 88, 98 in BAIS, KAIS, DHS).

1. ICF. 2018. Demographic and Health Surveys Standard Recode Manual for DHS7. The Demographic and Health Surveys Program. Rockville, Maryland, U.S.A.: ICF

| ISO_A3 | Sex    | Year    | Survey | Sample Size | Missing AFS | Missing age/DOB | AFS > age | AFS < 7 | ‘Ever sex’ only |
|--------|--------|---------|--------|-------------|-------------|-----------------|-----------|---------|-----------------|
| AGO    | Female | 2015-16 | DHS    | 14379       | -           | -               | -         | -       | 5.6             |
| AGO    | Male   | 2015-16 | DHS    | 5684        | -           | -               | -         | -       | 0.7             |
| BDI    | Female | 2010-11 | DHS    | 9389        | -           | -               | -         | -       | 3.2             |
| BDI    | Female | 2016-17 | DHS    | 34538       | -           | -               | -         | -       | 0.9             |
| BDI    | Male   | 2010-11 | DHS    | 4280        | -           | -               | -         | -       | 4.1             |
| BDI    | Male   | 2016-17 | DHS    | 15104       | -           | -               | -         | -       | 1.3             |
| BEN    | Female | 1996    | DHS    | 5491        | 0.2         | -               | -         | -       | 2.1             |
| BEN    | Female | 2001    | DHS    | 6219        | 0.3         | -               | -         | -       | 1.9             |
| BEN    | Female | 2006    | DHS    | 17794       | 0.1         | -               | -         | -       | 6.5             |
| BEN    | Female | 2011-12 | DHS    | 16599       | -           | -               | -         | -       | 11.4            |
| BEN    | Female | 2014    | MICS   | 16348       | 3.8         | 3.3             | -         | 0.1     | -               |
| BEN    | Female | 2017-18 | DHS    | 15928       | -           | -               | -         | -       | 0.2             |
| BEN    | Male   | 1996    | DHS    | 1535        | 0.7         | -               | -         | -       | 0.3             |
| BEN    | Male   | 2001    | DHS    | 2709        | 0.2         | -               | -         | -       | -               |
| BEN    | Male   | 2006    | DHS    | 5321        | 0.1         | -               | -         | -       | -               |
| BEN    | Male   | 2011-12 | DHS    | 5180        | -           | -               | -         | -       | 2.8             |
| BEN    | Male   | 2014    | MICS   | 4577        | 5.1         | 4.5             | -         | -       | -               |
| BEN    | Male   | 2017-18 | DHS    | 7595        | -           | -               | -         | -       | -               |
| BFA    | Female | 1992-93 | DHS    | 6354        | 3.5         | -               | -         | -       | 1.4             |



| ISO_A3 | Sex    | Year    | Survey | Sample Size | Missing AFS | Missing age/DOB | AFS > age | AFS < 7 | 'Ever sex' only |
|--------|--------|---------|--------|-------------|-------------|-----------------|-----------|---------|-----------------|
| BFA    | Female | 1998-99 | DHS    | 6445        | 0.1         | -               | -         | -       | 6.5             |
| BFA    | Female | 2003    | DHS    | 12477       | 0.3         | -               | -         | -       | 4.8             |
| BFA    | Female | 2010    | DHS    | 17087       | 0.1         | -               | -         | -       | 2.4             |
| BFA    | Female | 2014-15 | PMA    | 2219        | 10          | -               | -         | 1.7     | 11.4            |
| BFA    | Female | 2015    | PMA    | 9657        | 78.3        | 77.7            | -         | -       | 1.9             |
| BFA    | Female | 2016    | PMA    | 3493        | 5           | 3.7             | -         | -       | 4               |
| BFA    | Female | 2016-17 | PMA    | 3413        | 5           | 4.5             | -         | 0.1     | 1               |
| BFA    | Female | 2017-18 | PMA    | 3659        | 2.9         | 2.5             | -         | 0.1     | 1.1             |
| BFA    | Female | 2018-19 | PMA    | 3510        | 3.1         | 2.6             | -         | -       | 0.8             |
| BFA    | Male   | 1998-99 | DHS    | 2641        | 0.3         | -               | -         | -       | 5.3             |
| BFA    | Male   | 2003    | DHS    | 3605        | 0.2         | -               | -         | -       | -               |
| BFA    | Male   | 2010    | DHS    | 7307        | 0.1         | -               | -         | -       | 1.9             |
| BWA    | Female | 2001    | AIS    | 2362        | 0.1         | -               | -         | -       | 3.6             |
| BWA    | Female | 2004    | AIS    | 8691        | -           | -               | -         | -       | 6.6             |
| BWA    | Female | 2008    | AIS    | 7783        | 0.8         | -               | -         | -       | 5.7             |
| BWA    | Male   | 2001    | AIS    | 2030        | 0.3         | 0.1             | -         | -       | 5.8             |
| BWA    | Male   | 2004    | AIS    | 7143        | -           | -               | -         | -       | 7.4             |
| BWA    | Male   | 2008    | AIS    | 6424        | 0.8         | -               | -         | -       | 7               |
| CAF    | Female | 1994-95 | DHS    | 5884        | 0.2         | -               | -         | -       | 0.6             |
| CAF    | Female | 2010    | MICS   | 12507       | 8.3         | -               | -         | 0.1     | -               |
| CAF    | Male   | 1994-95 | DHS    | 1729        | 0.2         | -               | -         | -       | 0.5             |
| CAF    | Male   | 2010    | MICS   | 6128        | 13.6        | 13.3            | 0.1       | -       | -               |
| CIV    | Female | 1994    | DHS    | 8099        | 0.1         | -               | -         | -       | 0.9             |
| CIV    | Female | 1998-99 | DHS    | 3040        | 0.2         | -               | -         | -       | 1.3             |
| CIV    | Female | 2005    | DHS    | 9686        | 0.2         | -               | -         | -       | 1.1             |
| CIV    | Female | 2011-12 | DHS    | 10060       | 0.2         | -               | -         | -       | 5.7             |
| CIV    | Female | 2016    | MICS   | 12463       | 6           | 5.5             | -         | -       | -               |
| CIV    | Female | 2017    | PMA    | 2877        | 3.8         | 3.1             | -         | -       | 3.5             |
| CIV    | Female | 2017-18 | PHIA   | 12313       | 28.6        | -               | -         | -       | -               |
| CIV    | Female | 2018    | PMA    | 2864        | 2.6         | 2.3             | -         | 0.1     | 0.2             |
| CIV    | Male   | 1998-99 | DHS    | 886         | 0.1         | -               | -         | -       | -               |
| CIV    | Male   | 2011-12 | DHS    | 5135        | 0.3         | -               | -         | -       | 1.5             |
| CIV    | Male   | 2016    | MICS   | 5919        | 9.3         | 8.7             | -         | -       | -               |
| CIV    | Male   | 2017-18 | PHIA   | 11988       | 24.8        | -               | -         | -       | -               |
| CMR    | Female | 1991    | DHS    | 3871        | 0.3         | -               | -         | -       | 6.2             |
| CMR    | Female | 1998    | DHS    | 5501        | 0.1         | -               | -         | -       | 2.3             |
| CMR    | Female | 2004    | DHS    | 10656       | 0.2         | -               | -         | -       | 3.5             |
| CMR    | Female | 2011    | DHS    | 15426       | 0.1         | -               | -         | -       | 5.8             |
| CMR    | Female | 2014    | MICS   | 10447       | 5.8         | -               | -         | -       | -               |
| CMR    | Female | 2017-18 | PHIA   | 17394       | 13.8        | -               | -         | -       | -               |
| CMR    | Female | 2018-19 | DHS    | 14677       | -           | -               | -         | -       | 1.7             |
| CMR    | Male   | 1998    | DHS    | 2562        | 0.1         | -               | -         | -       | -               |
| CMR    | Male   | 2004    | DHS    | 5280        | 0.3         | -               | -         | -       | 0.1             |
| CMR    | Male   | 2011    | DHS    | 7191        | 0.3         | -               | -         | -       | -               |
| CMR    | Male   | 2014    | MICS   | 5345        | 9.4         | 9.2             | -         | -       | -               |
| CMR    | Male   | 2017-18 | PHIA   | 14981       | 15.7        | -               | -         | -       | -               |
| CMR    | Male   | 2018-19 | DHS    | 6978        | -           | -               | -         | -       | 1.1             |
| COD    | Female | 2007    | DHS    | 9995        | 0.1         | -               | -         | -       | 4.8             |
| COD    | Female | 2010    | MICS   | 13235       | 3           | -               | -         | 0.1     | -               |

| ISO_A3 | Sex    | Year    | Survey | Sample Size | Missing AFS | Missing age/DOB | AFS > age | AFS < 7 | 'Ever sex' only |
|--------|--------|---------|--------|-------------|-------------|-----------------|-----------|---------|-----------------|
| COD    | Female | 2012-14 | PMA    | 2163        | 1.4         | 100             | -         | -       | 3.6             |
| COD    | Female | 2013-14 | DHS    | 18827       | 0.1         | -               | -         | -       | 3.2             |
| COD    | Female | 2014    | PMA    | 11228       | 74.8        | 73.2            | -         | -       | 1               |
| COD    | Female | 2015    | PMA    | 2835        | 4.8         | 0.1             | -         | -       | 2.9             |
| COD    | Female | 2015-16 | PMA    | 4514        | 4.4         | 3.5             | -         | 0.1     | 4               |
| COD    | Female | 2016    | PMA    | 4507        | 5           | 4.3             | -         | 0.1     | 5               |
| COD    | Female | 2017    | PMA    | 4465        | 4.3         | 3.8             | -         | -       | 3.4             |
| COD    | Female | 2017-18 | MICS   | 21828       | 0.4         | -               | -         | -       | -               |
| COD    | Female | 2018    | PMA    | 4503        | 3.8         | 3.3             | -         | 0.1     | 2.1             |
| COD    | Female | 2019    | PMA    | 1942        | 1           | 0.6             | -         | -       | 2.1             |
| COD    | Male   | 2007    | DHS    | 4757        | 0.2         | -               | -         | -       | 1.2             |
| COD    | Male   | 2013-14 | DHS    | 8656        | 0.1         | -               | -         | -       | 0.9             |
| COD    | Male   | 2017-18 | MICS   | 6161        | 0.8         | 0.8             | -         | -       | -               |
| COG    | Female | 2005    | DHS    | 7051        | -           | -               | -         | -       | 0.5             |
| COG    | Female | 2009    | DHS    | 12413       | 0.5         | -               | -         | -       | 1.5             |
| COG    | Female | 2011-12 | DHS    | 10819       | 0.1         | -               | -         | -       | 2.1             |
| COG    | Female | 2014-15 | MICS   | 11841       | 5           | 4.6             | -         | -       | -               |
| COG    | Male   | 2005    | DHS    | 3146        | -           | -               | -         | -       | -               |
| COG    | Male   | 2011-12 | DHS    | 5145        | -           | -               | -         | -       | 0.3             |
| COG    | Male   | 2014-15 | MICS   | 5412        | 6.4         | -               | -         | -       | -               |
| COM    | Female | 1996    | DHS    | 3050        | 0.4         | -               | -         | -       | 2.6             |
| COM    | Female | 2012    | DHS    | 5329        | 0.2         | -               | -         | -       | 6.5             |
| COM    | Male   | 1996    | DHS    | 795         | 2.1         | -               | -         | -       | -               |
| COM    | Male   | 2012    | DHS    | 2167        | 0.7         | -               | -         | -       | 1.5             |
| ERI    | Female | 2010    | PHS    | 31701       | 68.8        | 4.7             | -         | -       | -               |
| ERI    | Male   | 2010    | PHS    | 6436        | 25.1        | 22              | -         | -       | -               |
| ETH    | Female | 2000    | DHS    | 15367       | 0.1         | -               | -         | 0.1     | 2.6             |
| ETH    | Female | 2005    | DHS    | 14070       | 0.1         | -               | -         | -       | 3.8             |
| ETH    | Female | 2010-11 | DHS    | 16515       | 0.1         | -               | -         | -       | 4.2             |
| ETH    | Female | 2014    | PMA    | 13561       | 2.5         | 1.6             | 0.1       | 0.1     | 3.7             |
| ETH    | Female | 2015    | PMA    | 7705        | 1.1         | 0.9             | 0.1       | -       | 1.8             |
| ETH    | Female | 2016    | DHS    | 15683       | -           | -               | -         | -       | 1.6             |
| ETH    | Female | 2016    | PMA    | 7641        | 1.4         | 1.3             | 0.1       | 0.1     | 2.1             |
| ETH    | Female | 2017    | PMA    | 7577        | 1.6         | 1.4             | -         | -       | 2.1             |
| ETH    | Female | 2018    | PMA    | 7690        | 2.2         | 1.9             | -         | 0.1     | 1.5             |
| ETH    | Female | 2019    | PMA    | 9106        | 2.2         | 2               | -         | 0.1     | 1.1             |
| ETH    | Male   | 2000    | DHS    | 2607        | -           | -               | -         | -       | 1.8             |
| ETH    | Male   | 2005    | DHS    | 6033        | 0.1         | -               | -         | -       | 1.1             |
| ETH    | Male   | 2010-11 | DHS    | 14110       | 0.1         | -               | -         | -       | 3               |
| ETH    | Male   | 2016    | DHS    | 12688       | -           | -               | -         | -       | 1.4             |
| GAB    | Female | 2000-01 | DHS    | 6183        | 0.1         | -               | -         | -       | 3.5             |
| GAB    | Female | 2012    | DHS    | 8422        | 0.1         | -               | -         | -       | 5.6             |
| GAB    | Male   | 2000-01 | DHS    | 2004        | 0.2         | -               | -         | 0.1     | 0.1             |
| GAB    | Male   | 2012    | DHS    | 5654        | 0.2         | -               | -         | -       | 0.6             |
| GHA    | Female | 1993-94 | DHS    | 4562        | 0.2         | -               | -         | -       | 0.2             |
| GHA    | Female | 1998-99 | DHS    | 4843        | 0.1         | -               | -         | -       | 4.7             |
| GHA    | Female | 2003    | DHS    | 5691        | 0.1         | -               | -         | -       | 5.8             |
| GHA    | Female | 2006    | MICS   | 6240        | 5.9         | 5.6             | -         | 0.1     | -               |
| GHA    | Female | 2008    | DHS    | 4916        | -           | -               | -         | -       | 4.7             |

| ISO_A3 | Sex    | Year    | Survey | Sample Size | Missing AFS | Missing age/DOB | AFS > age | AFS < 7 | 'Ever sex' only |
|--------|--------|---------|--------|-------------|-------------|-----------------|-----------|---------|-----------------|
| GHA    | Female | 2011    | MICS   | 10963       | 3.1         | -               | -         | -       | -               |
| GHA    | Female | 2012-13 | PMA    | 4155        | 11.4        | 100             | -         | 0.4     | 3.5             |
| GHA    | Female | 2014    | DHS    | 9396        | -           | -               | -         | -       | 3.4             |
| GHA    | Female | 2014    | PMA    | 9035        | 6.1         | 3.8             | -         | 0.1     | 4.4             |
| GHA    | Female | 2015    | PMA    | 5390        | 3.3         | 2.4             | -         | 0.1     | 2.8             |
| GHA    | Female | 2016    | PMA    | 3850        | 4           | 2.7             | -         | -       | 3.7             |
| GHA    | Female | 2017-18 | MICS   | 14609       | 1.9         | -               | -         | -       | -               |
| GHA    | Male   | 1993-94 | DHS    | 1302        | 0.3         | -               | -         | -       | -               |
| GHA    | Male   | 1998-99 | DHS    | 1546        | 0.1         | -               | -         | -       | 0.1             |
| GHA    | Male   | 2003    | DHS    | 5015        | 0.1         | -               | -         | -       | 0.4             |
| GHA    | Male   | 2008    | DHS    | 4568        | 0.1         | -               | -         | -       | 0.5             |
| GHA    | Male   | 2011    | MICS   | 3511        | 5.4         | 5.4             | -         | -       | -               |
| GHA    | Male   | 2014    | DHS    | 4388        | -           | -               | -         | -       | 1.3             |
| GHA    | Male   | 2017-18 | MICS   | 5476        | 2.8         | 2.8             | -         | -       | -               |
| GIN    | Female | 1999    | DHS    | 6753        | 0.2         | -               | -         | -       | 7.2             |
| GIN    | Female | 2005    | DHS    | 7954        | 0.2         | -               | -         | -       | 6.5             |
| GIN    | Female | 2012    | DHS    | 9142        | 0.1         | -               | -         | -       | 2.7             |
| GIN    | Female | 2016    | MICS   | 10245       | 6.6         | -               | -         | -       | -               |
| GIN    | Female | 2018    | DHS    | 10874       | -           | -               | -         | -       | 2.4             |
| GIN    | Male   | 1999    | DHS    | 1980        | 0.4         | -               | -         | -       | -               |
| GIN    | Male   | 2005    | DHS    | 3174        | 0.2         | -               | -         | -       | 0.1             |
| GIN    | Male   | 2012    | DHS    | 3782        | 0.4         | -               | -         | -       | 0.1             |
| GIN    | Male   | 2018    | DHS    | 4117        | -           | -               | -         | -       | 2               |
| GMB    | Female | 2010    | MICS   | 15138       | 3           | -               | -         | 0.1     | -               |
| GMB    | Female | 2013    | DHS    | 10233       | 0.1         | -               | -         | -       | 4.5             |
| GMB    | Female | 2017-18 | MICS   | 14297       | 4.7         | -               | -         | -       | -               |
| GMB    | Female | 2019-20 | DHS    | 11865       | 0.7         | -               | -         | -       | -               |
| GMB    | Male   | 2013    | DHS    | 3821        | 0.3         | -               | -         | -       | 2.7             |
| GMB    | Male   | 2017-18 | MICS   | 5213        | 18.6        | 13.3            | -         | -       | -               |
| GMB    | Male   | 2019-20 | DHS    | 4636        | 0.9         | -               | -         | -       | -               |
| GNB    | Female | 2014    | MICS   | 10744       | 4.8         | -               | -         | -       | -               |
| GNB    | Male   | 2014    | MICS   | 4620        | 8.4         | 8.4             | -         | -       | -               |
| IDN    | Female | 2015    | PMA    | 11585       | 9.5         | 0.1             | -         | -       | 1.2             |
| IDN    | Female | 2016-17 | PMA    | 11379       | 7           | 6.1             | -         | -       | 0.6             |
| IND    | Female | 2016    | PMA    | 5658        | 6.7         | 3.6             | -         | 0.2     | 5               |
| IND    | Female | 2017    | PMA    | 12414       | 2.4         | 2               | -         | -       | 0.4             |
| IND    | Female | 2018    | PMA    | 6064        | 2.5         | 2.5             | -         | 0.1     | 0.1             |
| KEN    | Female | 1993    | DHS    | 7540        | 0.4         | -               | -         | -       | 5.6             |
| KEN    | Female | 1998    | DHS    | 7881        | 0.3         | -               | -         | -       | 3.8             |
| KEN    | Female | 2003    | DHS    | 8195        | 0.2         | -               | -         | -       | 4.3             |
| KEN    | Female | 2007    | AIS    | 10957       | 12.2        | 6.5             | 0.1       | -       | -               |
| KEN    | Female | 2008-09 | DHS    | 8444        | 0.1         | -               | -         | -       | 6.4             |
| KEN    | Female | 2012-13 | AIS    | 7898        | -           | -               | -         | -       | 7.8             |
| KEN    | Female | 2014    | DHS    | 31079       | 0.1         | -               | -         | 0.1     | 4.1             |
| KEN    | Female | 2014    | PMA    | 8456        | 5.7         | -               | -         | 0.1     | 4.8             |
| KEN    | Female | 2015    | PMA    | 9529        | 3           | 1.3             | -         | -       | 3.6             |
| KEN    | Female | 2016    | PMA    | 6048        | 2.3         | 1.1             | -         | 0.1     | 2.8             |
| KEN    | Female | 2017    | PMA    | 5977        | 1.8         | 1.1             | -         | 0.1     | 1.2             |
| KEN    | Female | 2018-19 | PMA    | 5776        | 1.3         | 0.9             | -         | -       | 0.8             |

| ISO_A3 | Sex    | Year    | Survey | Sample Size | Missing AFS | Missing age/DOB | AFS > age | AFS < 7 | 'Ever sex' only |
|--------|--------|---------|--------|-------------|-------------|-----------------|-----------|---------|-----------------|
| KEN    | Female | 2019    | PMA    | 9699        | 2           | 1.4             | -         | 0.1     | 0.5             |
| KEN    | Male   | 1993    | DHS    | 2336        | 0.3         | -               | -         | -       | 0.1             |
| KEN    | Male   | 1998    | DHS    | 3407        | 1           | -               | -         | -       | 4.6             |
| KEN    | Male   | 2003    | DHS    | 3578        | 0.3         | -               | -         | -       | 0.2             |
| KEN    | Male   | 2007    | AIS    | 8883        | 15.7        | 13.3            | 0.1       | -       | -               |
| KEN    | Male   | 2008-09 | DHS    | 3465        | -           | -               | -         | -       | 0.6             |
| KEN    | Male   | 2012-13 | AIS    | 5713        | -           | -               | -         | -       | 6.1             |
| KEN    | Male   | 2014    | DHS    | 12819       | 0.1         | -               | -         | 0.4     | 0.7             |
| LBR    | Female | 2006-07 | DHS    | 7092        | 0.5         | -               | -         | -       | 5.9             |
| LBR    | Female | 2013    | DHS    | 9239        | -           | -               | -         | -       | 4.3             |
| LBR    | Male   | 2006-07 | DHS    | 6009        | 0.2         | -               | -         | -       | 0.8             |
| LBR    | Male   | 2013    | DHS    | 4118        | -           | -               | -         | -       | 0.9             |
| LSO    | Female | 2004-05 | DHS    | 7095        | 0.2         | -               | -         | -       | 5.7             |
| LSO    | Female | 2009-10 | DHS    | 7624        | -           | -               | -         | -       | 1.6             |
| LSO    | Female | 2014    | DHS    | 6621        | -           | -               | -         | -       | 1               |
| LSO    | Female | 2016-17 | PHIA   | 10746       | 30.2        | -               | -         | -       | -               |
| LSO    | Male   | 2004-05 | DHS    | 2797        | 0.3         | -               | -         | -       | 1.4             |
| LSO    | Male   | 2009-10 | DHS    | 3317        | -           | -               | -         | -       | 4.9             |
| LSO    | Male   | 2014    | DHS    | 2931        | -           | -               | -         | -       | 2               |
| LSO    | Male   | 2016-17 | PHIA   | 8770        | 39          | -               | -         | -       | -               |
| MDG    | Female | 1992    | DHS    | 6260        | 0.1         | -               | -         | -       | 0.3             |
| MDG    | Female | 1997    | DHS    | 7060        | 0.1         | -               | -         | -       | 1.7             |
| MDG    | Female | 2003-04 | DHS    | 7949        | 0.1         | -               | -         | -       | 2.8             |
| MDG    | Female | 2008-09 | DHS    | 17375       | -           | -               | -         | -       | 2.1             |
| MDG    | Female | 2018    | MICS   | 18812       | 9           | -               | -         | -       | -               |
| MDG    | Male   | 2003-04 | DHS    | 2432        | 0.2         | -               | -         | -       | -               |
| MDG    | Male   | 2008-09 | DHS    | 8586        | 0.1         | -               | -         | -       | 0.3             |
| MDG    | Male   | 2018    | MICS   | 8980        | 15.2        | 0.1             | -         | -       | -               |
| MLI    | Female | 1995-96 | DHS    | 9704        | 0.1         | -               | -         | -       | 1.5             |
| MLI    | Female | 2001    | DHS    | 12849       | 0.3         | -               | -         | -       | 3.7             |
| MLI    | Female | 2006    | DHS    | 14583       | 0.1         | -               | -         | -       | 5.8             |
| MLI    | Female | 2009-10 | MICS   | 28846       | 7.5         | -               | -         | -       | -               |
| MLI    | Female | 2012-13 | DHS    | 10424       | -           | -               | -         | -       | 11.5            |
| MLI    | Female | 2015    | MICS   | 18409       | 7           | -               | -         | -       | -               |
| MLI    | Female | 2018    | DHS    | 10519       | -           | -               | -         | -       | 2               |
| MLI    | Male   | 1995-96 | DHS    | 2474        | -           | -               | -         | -       | -               |
| MLI    | Male   | 2001    | DHS    | 3405        | 0.7         | -               | -         | -       | -               |
| MLI    | Male   | 2006    | DHS    | 4207        | 0.3         | -               | -         | -       | 2.5             |
| MLI    | Male   | 2012-13 | DHS    | 4399        | -           | -               | -         | -       | 4.9             |
| MLI    | Male   | 2015    | MICS   | 8419        | 12.5        | 11.8            | -         | -       | -               |
| MLI    | Male   | 2018    | DHS    | 4618        | -           | -               | -         | -       | 1.3             |
| MOZ    | Female | 1997    | DHS    | 8779        | 1.3         | -               | -         | -       | 1.9             |
| MOZ    | Female | 2003-04 | DHS    | 12418       | 0.1         | -               | -         | -       | 2.7             |
| MOZ    | Female | 2009    | DHS    | 11212       | 0.3         | -               | -         | -       | 0.1             |
| MOZ    | Female | 2011    | DHS    | 13745       | -           | -               | -         | -       | 3.2             |
| MOZ    | Female | 2015    | DHS    | 7749        | 0.1         | -               | -         | -       | 1.6             |
| MOZ    | Male   | 1997    | DHS    | 2335        | 0.9         | -               | -         | -       | 2.9             |
| MOZ    | Male   | 2003-04 | DHS    | 2900        | 0.3         | -               | -         | -       | 0.9             |
| MOZ    | Male   | 2011    | DHS    | 4035        | -           | -               | -         | -       | 2.2             |

| ISO_A3 | Sex    | Year    | Survey | Sample Size | Missing AFS | Missing age/DOB | AFS > age | AFS < 7 | 'Ever sex' only |
|--------|--------|---------|--------|-------------|-------------|-----------------|-----------|---------|-----------------|
| MOZ    | Male   | 2015    | DHS    | 5283        | -           | -               | -         | -       | 1.7             |
| MWI    | Female | 2000    | DHS    | 13220       | 0.1         | -               | -         | -       | 2.8             |
| MWI    | Female | 2004-05 | DHS    | 11698       | 0.2         | -               | -         | -       | 7.3             |
| MWI    | Female | 2006    | MICS   | 27073       | 3.2         | 3               | -         | -       | -               |
| MWI    | Female | 2010    | DHS    | 23020       | 0.1         | -               | -         | -       | 5.1             |
| MWI    | Female | 2013-14 | MICS   | 25430       | 4.8         | -               | -         | -       | -               |
| MWI    | Female | 2015-16 | DHS    | 24562       | -           | -               | -         | -       | 2.7             |
| MWI    | Female | 2015-16 | PHIA   | 14158       | 21.4        | -               | -         | 0.1     | -               |
| MWI    | Female | 2019-20 | MICS   | 24543       | -           | -               | -         | -       | -               |
| MWI    | Male   | 2000    | DHS    | 3092        | 0.3         | -               | -         | -       | 0.1             |
| MWI    | Male   | 2004-05 | DHS    | 3261        | 0.2         | -               | -         | -       | 1.9             |
| MWI    | Male   | 2010    | DHS    | 7175        | 0.1         | -               | -         | -       | 1.6             |
| MWI    | Male   | 2013-14 | MICS   | 7818        | 12.6        | 12.5            | -         | -       | -               |
| MWI    | Male   | 2015-16 | DHS    | 7478        | -           | -               | -         | -       | 0.9             |
| MWI    | Male   | 2015-16 | PHIA   | 12713       | 35.9        | -               | -         | 0.2     | -               |
| MWI    | Male   | 2019-20 | MICS   | 6791        | 0.1         | -               | -         | -       | -               |
| NAM    | Female | 1992    | DHS    | 5421        | 1.3         | -               | -         | -       | 6.3             |
| NAM    | Female | 2000    | DHS    | 6755        | 1.1         | -               | -         | -       | 8.8             |
| NAM    | Female | 2006-07 | DHS    | 9804        | 0.6         | -               | -         | -       | 7.3             |
| NAM    | Female | 2013    | DHS    | 10018       | 0.7         | -               | -         | -       | 5.6             |
| NAM    | Female | 2017    | PHIA   | 14160       | 33.8        | -               | -         | -       | -               |
| NAM    | Male   | 2000    | DHS    | 2954        | 1.5         | -               | -         | -       | -               |
| NAM    | Male   | 2006-07 | DHS    | 3915        | 0.7         | -               | -         | -       | 0.7             |
| NAM    | Male   | 2013    | DHS    | 4481        | 0.8         | -               | -         | -       | 0.7             |
| NAM    | Male   | 2017    | PHIA   | 12361       | 39.5        | -               | -         | -       | -               |
| NER    | Female | 1992    | DHS    | 6503        | 0.6         | -               | -         | -       | 3.6             |
| NER    | Female | 2006    | DHS    | 9223        | 0.3         | -               | -         | -       | 4.2             |
| NER    | Female | 2012    | DHS    | 11160       | 0.1         | -               | -         | -       | 4.4             |
| NER    | Female | 2015    | PMA    | 1408        | 5.7         | 3.8             | -         | -       | 2.9             |
| NER    | Female | 2016    | PMA    | 3193        | 6.3         | 4.6             | -         | 0.2     | 2.9             |
| NER    | Female | 2017    | PMA    | 3180        | 4.8         | 4.5             | -         | -       | 0.9             |
| NER    | Female | 2018    | PMA    | 1390        | 6.9         | 6.3             | -         | -       | 0.9             |
| NER    | Male   | 1998    | DHS    | 3542        | 0.3         | -               | -         | -       | 0.1             |
| NER    | Male   | 2006    | DHS    | 3549        | 0.4         | -               | -         | -       | 0.1             |
| NER    | Male   | 2012    | DHS    | 3928        | 0.3         | -               | -         | -       | 2.8             |
| NGA    | Female | 1990    | DHS    | 8781        | 0.5         | -               | -         | 0.2     | 9.7             |
| NGA    | Female | 2003    | DHS    | 7620        | 0.4         | -               | -         | -       | 5.1             |
| NGA    | Female | 2008    | DHS    | 33385       | 0.4         | -               | -         | -       | 6.5             |
| NGA    | Female | 2011    | MICS   | 33699       | 8.8         | -               | -         | 0.3     | -               |
| NGA    | Female | 2013    | DHS    | 38948       | 0.2         | -               | -         | -       | 5.2             |
| NGA    | Female | 2016    | PMA    | 11445       | 4.8         | 2.3             | -         | 0.4     | 4.2             |
| NGA    | Female | 2016-17 | MICS   | 36176       | 6.6         | 5               | -         | -       | -               |
| NGA    | Female | 2017    | PMA    | 11624       | 3           | 1.4             | -         | 0.1     | 3.5             |
| NGA    | Female | 2018    | DHS    | 41821       | -           | -               | -         | -       | 2.4             |
| NGA    | Female | 2018    | PMA    | 11470       | 3           | 2.1             | -         | 0.1     | 2.1             |
| NGA    | Female | 2019    | PMA    | 2016        | 1.6         | 0.4             | -         | -       | 0.7             |
| NGA    | Male   | 2003    | DHS    | 2346        | 0.2         | -               | -         | -       | -               |
| NGA    | Male   | 2008    | DHS    | 15486       | 0.3         | -               | -         | -       | 2.8             |
| NGA    | Male   | 2013    | DHS    | 17359       | 0.2         | -               | -         | -       | 3.5             |

| ISO_A3 | Sex    | Year    | Survey | Sample Size | Missing AFS | Missing age/DOB | AFS > age | AFS < 7 | 'Ever sex' only |
|--------|--------|---------|--------|-------------|-------------|-----------------|-----------|---------|-----------------|
| NGA    | Male   | 2016-17 | MICS   | 16514       | 9.9         | 8.1             | -         | 0.1     | -               |
| NGA    | Male   | 2018    | DHS    | 13311       | -           | -               | -         | -       | 1.6             |
| RWA    | Female | 1992    | DHS    | 6551        | 0.5         | -               | -         | -       | 1.2             |
| RWA    | Female | 2000    | DHS    | 10421       | -           | -               | -         | 0.1     | 1.2             |
| RWA    | Female | 2005    | DHS    | 11321       | -           | -               | -         | 0.3     | 2               |
| RWA    | Female | 2010-11 | DHS    | 13671       | -           | -               | -         | -       | 1.5             |
| RWA    | Female | 2014-15 | DHS    | 13497       | -           | -               | -         | 0.3     | 1.3             |
| RWA    | Female | 2018-19 | PHIA   | 18988       | 11.5        | -               | -         | -       | -               |
| RWA    | Female | 2019-20 | DHS    | 14634       | 0.2         | -               | -         | -       | -               |
| RWA    | Male   | 2000    | DHS    | 2717        | 0.3         | -               | -         | 0.4     | 1.4             |
| RWA    | Male   | 2005    | DHS    | 4820        | 0.1         | -               | -         | 1.2     | 1               |
| RWA    | Male   | 2010-11 | DHS    | 6329        | -           | -               | -         | 0.5     | 1.9             |
| RWA    | Male   | 2014-15 | DHS    | 6217        | -           | -               | -         | 0.8     | 2               |
| RWA    | Male   | 2018-19 | PHIA   | 16277       | 15.8        | -               | -         | -       | -               |
| RWA    | Male   | 2019-20 | DHS    | 6513        | 0.8         | -               | -         | -       | -               |
| SDN    | Male   | 2010    | MICS   | 16448       | 66.2        | 66.1            | -         | -       | 1.6             |
| SEN    | Female | 1992-93 | DHS    | 6310        | 0.5         | -               | -         | -       | 4.7             |
| SEN    | Female | 1997    | DHS    | 8593        | 1.2         | -               | -         | -       | 4.8             |
| SEN    | Female | 2005    | DHS    | 14602       | 0.3         | -               | -         | -       | 5.8             |
| SEN    | Female | 2010-11 | DHS    | 15688       | -           | -               | -         | -       | 5.3             |
| SEN    | Female | 2012-13 | DHS    | 8636        | -           | -               | -         | -       | 2.8             |
| SEN    | Female | 2014    | DHS    | 8488        | -           | -               | -         | -       | 2.6             |
| SEN    | Female | 2015    | DHS    | 8851        | -           | -               | -         | -       | 2.2             |
| SEN    | Female | 2016    | DHS    | 8865        | -           | -               | -         | -       | 2               |
| SEN    | Female | 2017    | DHS    | 16787       | -           | -               | -         | -       | 2.5             |
| SEN    | Female | 2018    | DHS    | 9414        | -           | -               | -         | 0.1     | 2.2             |
| SEN    | Female | 2019    | DHS    | 8649        | 2           | -               | -         | 0.1     | -               |
| SEN    | Female | 2019    | DHS    | 8649        | -           | -               | -         | 0.1     | 2               |
| SEN    | Male   | 1997    | DHS    | 4306        | 0.6         | -               | -         | -       | 11.2            |
| SEN    | Male   | 2005    | DHS    | 3761        | 0.5         | -               | -         | -       | 0.2             |
| SEN    | Male   | 2010-11 | DHS    | 4929        | -           | -               | -         | -       | 3               |
| SEN    | Male   | 2014    | DHS    | 3371        | -           | -               | -         | -       | 2.4             |
| SEN    | Male   | 2015    | DHS    | 3734        | -           | -               | -         | -       | 2.2             |
| SEN    | Male   | 2016    | DHS    | 3527        | -           | -               | -         | -       | 1.7             |
| SEN    | Male   | 2017    | DHS    | 6977        | -           | -               | -         | -       | 2.6             |
| SEN    | Male   | 2018    | DHS    | 3762        | -           | -               | -         | -       | 2.5             |
| SEN    | Male   | 2019    | DHS    | 3365        | 2.4         | -               | -         | -       | -               |
| SEN    | Male   | 2019    | DHS    | 3365        | -           | -               | -         | -       | 2.4             |
| SLE    | Female | 2008    | DHS    | 7374        | 0.5         | -               | -         | -       | 9.8             |
| SLE    | Female | 2010    | MICS   | 14066       | 5.3         | -               | -         | 0.1     | -               |
| SLE    | Female | 2013    | DHS    | 16658       | 0.2         | -               | -         | -       | 8.8             |
| SLE    | Female | 2017    | MICS   | 18006       | 1.1         | 0.3             | -         | 0.7     | -               |
| SLE    | Female | 2019    | DHS    | 15574       | 1.2         | -               | -         | -       | -               |
| SLE    | Male   | 2008    | DHS    | 3280        | 0.5         | -               | -         | -       | 1.5             |
| SLE    | Male   | 2013    | DHS    | 7262        | 0.2         | -               | -         | -       | 1.4             |
| SLE    | Male   | 2017    | MICS   | 7534        | 2           | 1.6             | 0.3       | -       | -               |
| SLE    | Male   | 2019    | DHS    | 7197        | 1           | -               | -         | -       | -               |
| SSD    | Female | 2010    | MICS   | 11568       | 22.1        | -               | -         | -       | 18              |
| STP    | Female | 2008-09 | DHS    | 2615        | 0.1         | -               | -         | -       | 3.6             |

| ISO_A3 | Sex    | Year    | Survey | Sample Size | Missing AFS | Missing age/DOB | AFS > age | AFS < 7 | 'Ever sex' only |
|--------|--------|---------|--------|-------------|-------------|-----------------|-----------|---------|-----------------|
| STP    | Female | 2014    | MICS   | 3101        | 5.4         | -               | -         | -       | -               |
| STP    | Female | 2019    | MICS   | 3115        | 0.3         | -               | -         | -       | -               |
| STP    | Male   | 2008-09 | DHS    | 2296        | 0.3         | -               | -         | -       | 0.8             |
| STP    | Male   | 2014    | MICS   | 2772        | 18.3        | 18.2            | -         | -       | -               |
| STP    | Male   | 2019    | MICS   | 1395        | 0.1         | -               | -         | -       | -               |
| SWZ    | Female | 2006-07 | DHS    | 4987        | 0.1         | -               | -         | -       | 7               |
| SWZ    | Female | 2010    | MICS   | 4956        | 5.4         | -               | -         | -       | -               |
| SWZ    | Female | 2014    | MICS   | 5001        | 4.8         | -               | -         | -       | 1.2             |
| SWZ    | Female | 2016-17 | PHIA   | 7413        | 11.2        | -               | -         | -       | -               |
| SWZ    | Male   | 2006-07 | DHS    | 4156        | 0.1         | -               | -         | -       | 0.5             |
| SWZ    | Male   | 2010    | MICS   | 4646        | 10.1        | 10.1            | -         | -       | -               |
| SWZ    | Male   | 2014    | MICS   | 1629        | 10.4        | 10.4            | -         | -       | 2.6             |
| SWZ    | Male   | 2016-17 | PHIA   | 5926        | 20.2        | -               | -         | 0.1     | -               |
| TCD    | Female | 1996-97 | DHS    | 7454        | 0.1         | -               | -         | -       | -               |
| TCD    | Female | 2004    | DHS    | 6085        | -           | -               | -         | -       | 0.5             |
| TCD    | Female | 2010    | MICS   | 18088       | 12.8        | -               | -         | 0.1     | -               |
| TCD    | Female | 2014-15 | DHS    | 17719       | 0.3         | -               | -         | -       | 8               |
| TCD    | Male   | 1996-97 | DHS    | 2320        | 0.2         | -               | -         | -       | -               |
| TCD    | Male   | 2004    | DHS    | 1887        | 0.2         | -               | -         | -       | -               |
| TCD    | Male   | 2014-15 | DHS    | 5248        | 0.2         | -               | -         | -       | 3.4             |
| TGO    | Female | 1998    | DHS    | 8569        | -           | -               | -         | 0.1     | 3.6             |
| TGO    | Female | 2010    | MICS   | 7016        | 9.3         | -               | -         | -       | -               |
| TGO    | Female | 2013-14 | DHS    | 9480        | -           | -               | -         | -       | 5               |
| TGO    | Female | 2017    | MICS   | 7657        | 4.4         | -               | -         | -       | -               |
| TGO    | Male   | 2013-14 | DHS    | 4476        | 0.1         | -               | -         | 0.1     | 0.6             |
| TGO    | Male   | 2017    | MICS   | 2456        | 6.9         | 0.4             | 0.1       | -       | -               |
| TZA    | Female | 1991-92 | DHS    | 9238        | 0.7         | -               | -         | -       | 5.3             |
| TZA    | Female | 1996    | DHS    | 8120        | 0.3         | -               | -         | -       | 6.8             |
| TZA    | Female | 1999    | DHS    | 4029        | 0.1         | -               | -         | -       | 2.4             |
| TZA    | Female | 2003-04 | DHS    | 12522       | -           | -               | -         | -       | 0.1             |
| TZA    | Female | 2004-05 | DHS    | 10329       | -           | -               | -         | -       | 2.6             |
| TZA    | Female | 2007-08 | DHS    | 16318       | -           | -               | -         | -       | 2.3             |
| TZA    | Female | 2009-10 | DHS    | 10139       | -           | -               | -         | -       | 2               |
| TZA    | Female | 2011-12 | DHS    | 19319       | 0.2         | -               | -         | -       | 0.6             |
| TZA    | Female | 2015-16 | DHS    | 13266       | -           | -               | -         | -       | 0.6             |
| TZA    | Female | 2016-17 | PHIA   | 20699       | 10.2        | -               | -         | -       | -               |
| TZA    | Male   | 1991-92 | DHS    | 2114        | 0.5         | -               | -         | 0.1     | 0.2             |
| TZA    | Male   | 1996    | DHS    | 2256        | 0.7         | -               | -         | -       | 0.1             |
| TZA    | Male   | 1999    | DHS    | 3542        | -           | -               | -         | 0.1     | -               |
| TZA    | Male   | 2004-05 | DHS    | 2635        | 0.1         | -               | -         | 0.1     | 0.7             |
| TZA    | Male   | 2009-10 | DHS    | 2527        | -           | -               | -         | -       | 0.9             |
| TZA    | Male   | 2015-16 | DHS    | 3514        | -           | -               | -         | -       | 0.3             |
| TZA    | Male   | 2016-17 | PHIA   | 17978       | 17.6        | -               | -         | -       | -               |
| UGA    | Female | 1995    | DHS    | 7070        | 0.5         | -               | -         | -       | 4.6             |
| UGA    | Female | 2000-01 | DHS    | 7246        | 0.1         | -               | -         | -       | 5               |
| UGA    | Female | 2004-05 | AIS    | 10826       | 0.4         | -               | -         | 0.3     | -               |
| UGA    | Female | 2006    | DHS    | 8531        | -           | -               | -         | 0.1     | 2.7             |
| UGA    | Female | 2011    | DHS    | 30415       | -           | -               | -         | -       | 1.9             |
| UGA    | Female | 2014    | PMA    | 3986        | 7.9         | -               | -         | -       | 3.5             |

| ISO_A3 | Sex    | Year    | Survey | Sample Size | Missing AFS | Missing age/DOB | AFS > age | AFS < 7 | 'Ever sex' only |
|--------|--------|---------|--------|-------------|-------------|-----------------|-----------|---------|-----------------|
| UGA    | Female | 2015    | PMA    | 7748        | 6.8         | 2.3             | -         | 0.2     | 3.4             |
| UGA    | Female | 2016    | DHS    | 18506       | -           | -               | -         | -       | 2               |
| UGA    | Female | 2016    | PMA    | 4044        | 6.9         | 5.4             | -         | 0.1     | 5.8             |
| UGA    | Female | 2016-17 | PHIA   | 19103       | 12.3        | -               | -         | -       | -               |
| UGA    | Female | 2017    | PMA    | 4363        | 5.3         | 4.6             | -         | 0.1     | 3               |
| UGA    | Female | 2018    | PMA    | 4454        | 4.2         | 3.7             | -         | 0.1     | 3.7             |
| UGA    | Male   | 1995    | DHS    | 1996        | 0.2         | -               | -         | -       | 0.2             |
| UGA    | Male   | 2000-01 | DHS    | 1962        | 0.1         | -               | -         | -       | 12.3            |
| UGA    | Male   | 2004-05 | AIS    | 8830        | 0.1         | -               | -         | 0.3     | -               |
| UGA    | Male   | 2006    | DHS    | 2503        | 0.1         | -               | -         | 0.1     | 0.5             |
| UGA    | Male   | 2011    | DHS    | 2295        | 0.2         | -               | -         | -       | 2.3             |
| UGA    | Male   | 2016    | DHS    | 5336        | -           | -               | -         | -       | 0.8             |
| UGA    | Male   | 2016-17 | PHIA   | 15611       | 19.3        | -               | -         | -       | -               |
| ZAF    | Female | 1998    | DHS    | 11735       | 1.3         | -               | -         | -       | 5.3             |
| ZAF    | Female | 2002    | HSRC   | 5361        | 24.6        | -               | -         | -       | -               |
| ZAF    | Female | 2005    | HSRC   | 10057       | 1.1         | -               | 0.1       | -       | -               |
| ZAF    | Female | 2008    | HSRC   | 22458       | 29.8        | -               | 0.1       | -       | -               |
| ZAF    | Female | 2016    | DHS    | 8514        | -           | -               | -         | -       | 2.9             |
| ZAF    | Female | 2016-18 | HSRC   | 36692       | 35          | -               | -         | 0.1     | 0.1             |
| ZAF    | Male   | 2002    | HSRC   | 4427        | 31.9        | -               | -         | -       | -               |
| ZAF    | Male   | 2005    | HSRC   | 6338        | 1.9         | -               | 0.3       | -       | -               |
| ZAF    | Male   | 2008    | HSRC   | 20089       | 38.7        | 0.1             | 0.1       | -       | -               |
| ZAF    | Male   | 2016    | DHS    | 3618        | -           | -               | -         | -       | 0.8             |
| ZAF    | Male   | 2016-18 | HSRC   | 29388       | 42.5        | -               | -         | 0.1     | 0.1             |
| ZMB    | Female | 1992    | DHS    | 7060        | 0.2         | -               | -         | -       | 3.4             |
| ZMB    | Female | 1996-97 | DHS    | 8021        | 0.2         | -               | -         | -       | 2.9             |
| ZMB    | Female | 1998    | SBS    | 2046        | -           | -               | 0.2       | -       | -               |
| ZMB    | Female | 2000-01 | SBS    | 1791        | 0.1         | -               | 0.3       | 0.3     | -               |
| ZMB    | Female | 2001-02 | DHS    | 7658        | 0.2         | -               | -         | -       | 4.4             |
| ZMB    | Female | 2003    | SBS    | 2324        | 0.2         | -               | -         | 0.1     | -               |
| ZMB    | Female | 2005    | SBS    | 2174        | 0.2         | -               | 2.4       | -       | -               |
| ZMB    | Female | 2007    | DHS    | 7146        | 0.1         | -               | -         | -       | 6.4             |
| ZMB    | Female | 2009    | SBS    | 2398        | 0.1         | -               | 0.2       | -       | -               |
| ZMB    | Female | 2013-14 | DHS    | 16411       | 0.2         | -               | -         | -       | 6.9             |
| ZMB    | Female | 2016    | PHIA   | 15783       | 25.5        | -               | -         | -       | -               |
| ZMB    | Female | 2018-19 | DHS    | 13683       | -           | -               | -         | -       | 1.5             |
| ZMB    | Male   | 1996-97 | DHS    | 1849        | 0.5         | -               | -         | -       | 0.2             |
| ZMB    | Male   | 1998    | SBS    | 1656        | 0.1         | -               | 0.2       | 0.6     | -               |
| ZMB    | Male   | 2000-01 | SBS    | 1525        | -           | -               | 0.1       | 0.2     | -               |
| ZMB    | Male   | 2001-02 | DHS    | 2145        | 0.4         | -               | -         | -       | 0.6             |
| ZMB    | Male   | 2003    | SBS    | 2147        | 0.2         | -               | 0.1       | 0.5     | -               |
| ZMB    | Male   | 2005    | SBS    | 2046        | -           | -               | 1.6       | -       | -               |
| ZMB    | Male   | 2007    | DHS    | 6500        | 0.1         | -               | -         | 0.1     | 1               |
| ZMB    | Male   | 2009    | SBS    | 2085        | -           | -               | -         | 0.1     | -               |
| ZMB    | Male   | 2013-14 | DHS    | 14773       | 0.1         | -               | -         | -       | 1.1             |
| ZMB    | Male   | 2016    | PHIA   | 14101       | 36.6        | -               | -         | 0.2     | -               |
| ZMB    | Male   | 2018-19 | DHS    | 12132       | -           | -               | -         | -       | 0.9             |
| ZWE    | Female | 1994    | DHS    | 6128        | -           | -               | -         | -       | 5.1             |
| ZWE    | Female | 1999    | DHS    | 5907        | -           | -               | -         | -       | 6.2             |



| ISO_A3 | Sex    | Year    | Survey | Sample Size | Missing AFS | Missing age/DOB | AFS > age | AFS < 7 | 'Ever sex' only |
|--------|--------|---------|--------|-------------|-------------|-----------------|-----------|---------|-----------------|
| ZWE    | Female | 2005-06 | DHS    | 8907        | 0.1         | -               | -         | -       | 3.3             |
| ZWE    | Female | 2010-11 | DHS    | 9171        | -           | -               | -         | -       | 5.1             |
| ZWE    | Female | 2014    | MICS   | 15376       | 6.3         | -               | -         | -       | -               |
| ZWE    | Female | 2015    | DHS    | 9955        | -           | -               | -         | -       | 0.6             |
| ZWE    | Female | 2015-16 | PHIA   | 15976       | 11.6        | -               | -         | -       | -               |
| ZWE    | Female | 2019    | MICS   | 10703       | 5.4         | -               | -         | -       | -               |
| ZWE    | Male   | 1994    | DHS    | 2141        | 0.1         | -               | -         | -       | 0.2             |
| ZWE    | Male   | 1999    | DHS    | 2609        | 0.2         | -               | -         | -       | -               |
| ZWE    | Male   | 2005-06 | DHS    | 7175        | 0.3         | -               | -         | -       | 0.8             |
| ZWE    | Male   | 2010-11 | DHS    | 7480        | -           | -               | -         | -       | 3               |
| ZWE    | Male   | 2014    | MICS   | 9008        | 12.2        | 12.1            | -         | -       | -               |
| ZWE    | Male   | 2015    | DHS    | 8396        | -           | -               | -         | -       | 2               |
| ZWE    | Male   | 2015-16 | PHIA   | 13015       | 22.8        | -               | -         | -       | -               |
| ZWE    | Male   | 2019    | MICS   | 4677        | 10.7        | 10.7            | -         | -       | -               |

## Supplemental Table S2. Proportion ever had sex by country, sex, and year of birth

ISO\_A3 : ISO 3166-1 alpha-3 code for countries  
 ≤ 15, 18 : Cumulative proportion ever had sex by age 15 and 18 years  
 – : No surveys available for the sex in this country

Annual estimates can be found in file sexual\_debut\_by\_country\_age\_sex.xlsx.

| ISO_A3 | Year turned age 15 | Male (≤ 15)      | Female (≤ 15)    | Male (≤ 18)      | Female (≤ 18)    |
|--------|--------------------|------------------|------------------|------------------|------------------|
| AGO    | 1985               | 0.39 [0.34-0.44] | 0.26 [0.22-0.32] | 0.79 [0.75-0.82] | 0.77 [0.73-0.80] |
| AGO    | 1995               | 0.38 [0.32-0.44] | 0.27 [0.22-0.32] | 0.77 [0.73-0.82] | 0.77 [0.73-0.80] |
| AGO    | 2005               | 0.37 [0.33-0.40] | 0.25 [0.23-0.28] | 0.77 [0.74-0.79] | 0.76 [0.74-0.78] |
| AGO    | 2015               | 0.35 [0.30-0.42] | 0.24 [0.19-0.30] | 0.75 [0.70-0.80] | 0.75 [0.70-0.79] |
| BDI    | 1985               | 0.08 [0.07-0.10] | 0.04 [0.03-0.05] | 0.24 [0.20-0.29] | 0.25 [0.21-0.28] |
| BDI    | 1995               | 0.07 [0.06-0.08] | 0.04 [0.04-0.05] | 0.21 [0.19-0.24] | 0.27 [0.24-0.29] |
| BDI    | 2005               | 0.06 [0.05-0.06] | 0.04 [0.04-0.05] | 0.17 [0.16-0.19] | 0.26 [0.24-0.27] |
| BDI    | 2015               | 0.05 [0.05-0.06] | 0.02 [0.02-0.03] | 0.16 [0.14-0.18] | 0.18 [0.16-0.21] |
| BEN    | 1985               | 0.24 [0.22-0.27] | 0.15 [0.14-0.17] | 0.62 [0.59-0.65] | 0.57 [0.55-0.60] |
| BEN    | 1995               | 0.21 [0.19-0.22] | 0.16 [0.15-0.17] | 0.57 [0.54-0.59] | 0.58 [0.57-0.60] |
| BEN    | 2005               | 0.16 [0.15-0.17] | 0.16 [0.15-0.17] | 0.49 [0.47-0.52] | 0.58 [0.57-0.60] |
| BEN    | 2015               | 0.09 [0.08-0.10] | 0.14 [0.13-0.16] | 0.34 [0.31-0.37] | 0.55 [0.53-0.58] |
| BFA    | 1985               | 0.05 [0.03-0.06] | 0.16 [0.14-0.17] | 0.31 [0.26-0.36] | 0.67 [0.65-0.69] |
| BFA    | 1995               | 0.04 [0.04-0.05] | 0.12 [0.11-0.13] | 0.30 [0.27-0.33] | 0.60 [0.58-0.62] |
| BFA    | 2005               | 0.03 [0.02-0.04] | 0.09 [0.09-0.10] | 0.23 [0.20-0.26] | 0.54 [0.52-0.55] |
| BFA    | 2015               | 0.01 [0.01-0.03] | 0.08 [0.07-0.08] | 0.14 [0.09-0.21] | 0.49 [0.46-0.51] |
| BWA    | 1985               | 0.09 [0.07-0.12] | 0.04 [0.03-0.05] | 0.39 [0.34-0.45] | 0.36 [0.30-0.40] |
| BWA    | 1995               | 0.09 [0.07-0.10] | 0.04 [0.03-0.04] | 0.38 [0.35-0.41] | 0.34 [0.31-0.36] |
| BWA    | 2005               | 0.05 [0.04-0.06] | 0.03 [0.03-0.04] | 0.28 [0.24-0.32] | 0.31 [0.28-0.35] |
| BWA    | 2015               | 0.03 [0.02-0.05] | 0.03 [0.02-0.05] | 0.19 [0.11-0.28] | 0.28 [0.20-0.39] |
| CAF    | 1985               | 0.15 [0.12-0.18] | 0.34 [0.30-0.37] | 0.56 [0.50-0.61] | 0.80 [0.78-0.83] |
| CAF    | 1995               | 0.15 [0.13-0.18] | 0.33 [0.30-0.36] | 0.57 [0.53-0.61] | 0.80 [0.78-0.82] |
| CAF    | 2005               | 0.15 [0.13-0.17] | 0.35 [0.33-0.37] | 0.57 [0.53-0.60] | 0.81 [0.80-0.82] |
| CAF    | 2015               | 0.14 [0.12-0.16] | 0.26 [0.24-0.29] | 0.55 [0.51-0.59] | 0.75 [0.73-0.77] |
| CIV    | 1985               | 0.27 [0.21-0.33] | 0.19 [0.17-0.20] | 0.67 [0.61-0.72] | 0.67 [0.65-0.69] |
| CIV    | 1995               | 0.19 [0.15-0.22] | 0.20 [0.18-0.21] | 0.57 [0.53-0.62] | 0.68 [0.67-0.70] |
| CIV    | 2005               | 0.12 [0.11-0.14] | 0.19 [0.18-0.20] | 0.47 [0.45-0.50] | 0.68 [0.66-0.69] |
| CIV    | 2015               | 0.11 [0.09-0.13] | 0.16 [0.14-0.17] | 0.45 [0.41-0.49] | 0.63 [0.61-0.66] |
| CMR    | 1985               | 0.22 [0.19-0.25] | 0.34 [0.31-0.36] | 0.62 [0.59-0.64] | 0.80 [0.78-0.81] |
| CMR    | 1995               | 0.17 [0.16-0.19] | 0.24 [0.22-0.26] | 0.56 [0.54-0.58] | 0.72 [0.71-0.74] |
| CMR    | 2005               | 0.12 [0.11-0.13] | 0.16 [0.15-0.18] | 0.48 [0.46-0.50] | 0.64 [0.62-0.65] |
| CMR    | 2015               | 0.08 [0.07-0.10] | 0.13 [0.12-0.14] | 0.40 [0.37-0.43] | 0.58 [0.56-0.60] |
| COD    | 1985               | 0.12 [0.10-0.14] | 0.17 [0.16-0.18] | 0.46 [0.42-0.50] | 0.60 [0.57-0.61] |
| COD    | 1995               | 0.16 [0.14-0.18] | 0.19 [0.18-0.20] | 0.53 [0.51-0.57] | 0.62 [0.61-0.64] |
| COD    | 2005               | 0.22 [0.20-0.24] | 0.21 [0.20-0.21] | 0.62 [0.59-0.64] | 0.64 [0.63-0.65] |
| COD    | 2015               | 0.21 [0.19-0.24] | 0.22 [0.21-0.23] | 0.61 [0.58-0.64] | 0.66 [0.65-0.68] |
| COG    | 1985               | 0.39 [0.34-0.45] | 0.38 [0.34-0.41] | 0.81 [0.78-0.84] | 0.86 [0.84-0.87] |
| COG    | 1995               | 0.35 [0.32-0.39] | 0.30 [0.28-0.32] | 0.78 [0.76-0.81] | 0.82 [0.80-0.83] |
| COG    | 2005               | 0.27 [0.25-0.29] | 0.26 [0.24-0.28] | 0.72 [0.69-0.74] | 0.78 [0.77-0.80] |

|     |      |                  |                  |                  |                  |
|-----|------|------------------|------------------|------------------|------------------|
| COG | 2015 | 0.20 [0.17-0.25] | 0.20 [0.18-0.23] | 0.64 [0.58-0.69] | 0.73 [0.70-0.76] |
| COM | 1985 | 0.14 [0.11-0.18] | 0.16 [0.12-0.20] | 0.43 [0.38-0.49] | 0.41 [0.36-0.46] |
| COM | 1995 | 0.15 [0.12-0.18] | 0.13 [0.10-0.16] | 0.44 [0.39-0.50] | 0.36 [0.32-0.41] |
| COM | 2005 | 0.14 [0.11-0.16] | 0.11 [0.09-0.12] | 0.43 [0.39-0.47] | 0.33 [0.30-0.36] |
| COM | 2015 | 0.11 [0.07-0.16] | 0.08 [0.05-0.12] | 0.38 [0.30-0.47] | 0.27 [0.19-0.36] |
| ERI | 1985 | 0.03 [0.02-0.05] | 0.25 [0.20-0.30] | 0.18 [0.14-0.22] | 0.53 [0.48-0.59] |
| ERI | 1995 | 0.03 [0.02-0.03] | 0.18 [0.14-0.22] | 0.15 [0.12-0.18] | 0.45 [0.40-0.51] |
| ERI | 2005 | 0.02 [0.01-0.03] | 0.10 [0.08-0.13] | 0.13 [0.11-0.15] | 0.34 [0.30-0.38] |
| ERI | 2015 | 0.02 [0.01-0.03] | 0.07 [0.03-0.14] | 0.11 [0.07-0.18] | 0.28 [0.17-0.40] |
| ETH | 1985 | 0.05 [0.04-0.06] | 0.23 [0.22-0.24] | 0.24 [0.21-0.26] | 0.56 [0.54-0.57] |
| ETH | 1995 | 0.04 [0.03-0.04] | 0.18 [0.17-0.19] | 0.20 [0.19-0.22] | 0.50 [0.48-0.51] |
| ETH | 2005 | 0.03 [0.02-0.03] | 0.12 [0.12-0.13] | 0.17 [0.15-0.18] | 0.41 [0.40-0.42] |
| ETH | 2015 | 0.02 [0.02-0.03] | 0.11 [0.10-0.11] | 0.15 [0.12-0.17] | 0.38 [0.36-0.39] |
| GAB | 1985 | 0.43 [0.39-0.48] | 0.33 [0.30-0.37] | 0.82 [0.79-0.85] | 0.85 [0.83-0.87] |
| GAB | 1995 | 0.41 [0.37-0.45] | 0.25 [0.23-0.28] | 0.81 [0.78-0.83] | 0.80 [0.78-0.82] |
| GAB | 2005 | 0.33 [0.30-0.36] | 0.20 [0.18-0.22] | 0.75 [0.73-0.78] | 0.75 [0.73-0.78] |
| GAB | 2015 | 0.22 [0.16-0.28] | 0.16 [0.12-0.22] | 0.64 [0.56-0.71] | 0.70 [0.62-0.77] |
| GHA | 1985 | 0.07 [0.06-0.08] | 0.10 [0.09-0.11] | 0.31 [0.28-0.34] | 0.44 [0.41-0.46] |
| GHA | 1995 | 0.07 [0.06-0.08] | 0.10 [0.09-0.10] | 0.30 [0.28-0.33] | 0.43 [0.41-0.45] |
| GHA | 2005 | 0.07 [0.06-0.08] | 0.10 [0.09-0.10] | 0.31 [0.29-0.34] | 0.44 [0.42-0.46] |
| GHA | 2015 | 0.08 [0.07-0.09] | 0.11 [0.10-0.12] | 0.33 [0.30-0.37] | 0.46 [0.43-0.48] |
| GIN | 1985 | 0.23 [0.20-0.27] | 0.37 [0.34-0.40] | 0.60 [0.56-0.65] | 0.78 [0.76-0.79] |
| GIN | 1995 | 0.18 [0.16-0.21] | 0.31 [0.29-0.34] | 0.54 [0.51-0.58] | 0.74 [0.72-0.76] |
| GIN | 2005 | 0.10 [0.09-0.12] | 0.26 [0.24-0.27] | 0.40 [0.37-0.43] | 0.70 [0.68-0.71] |
| GIN | 2015 | 0.05 [0.04-0.06] | 0.17 [0.16-0.19] | 0.26 [0.22-0.29] | 0.60 [0.58-0.62] |
| GMB | 1985 | 0.04 [0.03-0.06] | 0.16 [0.14-0.18] | 0.17 [0.13-0.21] | 0.51 [0.48-0.54] |
| GMB | 1995 | 0.05 [0.04-0.07] | 0.14 [0.12-0.15] | 0.19 [0.16-0.23] | 0.47 [0.45-0.50] |
| GMB | 2005 | 0.06 [0.06-0.07] | 0.10 [0.09-0.11] | 0.22 [0.20-0.24] | 0.41 [0.39-0.43] |
| GMB | 2015 | 0.08 [0.07-0.09] | 0.06 [0.05-0.07] | 0.27 [0.24-0.29] | 0.31 [0.29-0.33] |
| GNB | 1985 | 0.09 [0.05-0.13] | 0.23 [0.17-0.29] | 0.42 [0.31-0.53] | 0.79 [0.73-0.83] |
| GNB | 1995 | 0.13 [0.09-0.17] | 0.20 [0.16-0.23] | 0.51 [0.43-0.58] | 0.76 [0.72-0.79] |
| GNB | 2005 | 0.15 [0.13-0.17] | 0.20 [0.18-0.22] | 0.55 [0.52-0.59] | 0.76 [0.74-0.78] |
| GNB | 2015 | 0.09 [0.07-0.11] | 0.13 [0.11-0.15] | 0.42 [0.37-0.48] | 0.67 [0.63-0.70] |
| KEN | 1985 | 0.25 [0.22-0.28] | 0.13 [0.12-0.14] | 0.58 [0.54-0.61] | 0.47 [0.45-0.49] |
| KEN | 1995 | 0.25 [0.23-0.26] | 0.13 [0.12-0.14] | 0.57 [0.55-0.60] | 0.47 [0.46-0.49] |
| KEN | 2005 | 0.23 [0.22-0.25] | 0.14 [0.13-0.15] | 0.56 [0.54-0.58] | 0.50 [0.49-0.51] |
| KEN | 2015 | 0.18 [0.16-0.21] | 0.15 [0.14-0.16] | 0.48 [0.43-0.52] | 0.51 [0.49-0.53] |
| LBR | 1985 | 0.13 [0.10-0.16] | 0.16 [0.13-0.20] | 0.59 [0.53-0.65] | 0.78 [0.74-0.82] |
| LBR | 1995 | 0.12 [0.10-0.14] | 0.20 [0.17-0.23] | 0.57 [0.53-0.61] | 0.82 [0.80-0.84] |
| LBR | 2005 | 0.12 [0.11-0.14] | 0.26 [0.23-0.28] | 0.59 [0.55-0.62] | 0.86 [0.84-0.87] |
| LBR | 2015 | 0.11 [0.07-0.14] | 0.24 [0.19-0.30] | 0.55 [0.46-0.63] | 0.85 [0.81-0.88] |
| LSO | 1985 | 0.10 [0.08-0.13] | 0.08 [0.07-0.09] | 0.44 [0.39-0.48] | 0.50 [0.46-0.54] |
| LSO | 1995 | 0.15 [0.13-0.17] | 0.06 [0.05-0.07] | 0.51 [0.48-0.54] | 0.45 [0.42-0.48] |
| LSO | 2005 | 0.20 [0.18-0.22] | 0.06 [0.05-0.06] | 0.58 [0.55-0.60] | 0.43 [0.41-0.46] |
| LSO | 2015 | 0.15 [0.13-0.18] | 0.04 [0.03-0.05] | 0.52 [0.49-0.56] | 0.36 [0.33-0.40] |
| MDG | 1985 | 0.09 [0.08-0.11] | 0.11 [0.10-0.13] | 0.55 [0.50-0.58] | 0.53 [0.49-0.56] |
| MDG | 1995 | 0.10 [0.09-0.11] | 0.17 [0.15-0.19] | 0.56 [0.53-0.59] | 0.63 [0.60-0.65] |
| MDG | 2005 | 0.10 [0.09-0.12] | 0.20 [0.18-0.23] | 0.57 [0.54-0.60] | 0.68 [0.65-0.70] |
| MDG | 2015 | 0.12 [0.11-0.14] | 0.26 [0.23-0.29] | 0.61 [0.58-0.65] | 0.73 [0.70-0.75] |
| MLI | 1985 | 0.10 [0.09-0.12] | 0.39 [0.37-0.40] | 0.41 [0.37-0.44] | 0.81 [0.80-0.82] |
| MLI | 1995 | 0.07 [0.06-0.08] | 0.29 [0.28-0.31] | 0.33 [0.30-0.35] | 0.75 [0.74-0.76] |

|     |      |                  |                  |                  |                  |
|-----|------|------------------|------------------|------------------|------------------|
| MLI | 2005 | 0.05 [0.04-0.06] | 0.22 [0.21-0.23] | 0.26 [0.24-0.28] | 0.68 [0.67-0.69] |
| MLI | 2015 | 0.04 [0.03-0.05] | 0.17 [0.16-0.18] | 0.22 [0.20-0.26] | 0.62 [0.61-0.64] |
| MOZ | 1985 | 0.20 [0.17-0.24] | 0.36 [0.33-0.38] | 0.69 [0.65-0.74] | 0.82 [0.80-0.83] |
| MOZ | 1995 | 0.22 [0.19-0.25] | 0.28 [0.27-0.30] | 0.71 [0.68-0.74] | 0.76 [0.75-0.78] |
| MOZ | 2005 | 0.20 [0.18-0.22] | 0.26 [0.24-0.27] | 0.69 [0.66-0.72] | 0.74 [0.73-0.75] |
| MOZ | 2015 | 0.18 [0.14-0.21] | 0.22 [0.20-0.25] | 0.66 [0.61-0.70] | 0.71 [0.68-0.74] |
| MWI | 1985 | 0.21 [0.19-0.23] | 0.27 [0.26-0.28] | 0.58 [0.55-0.60] | 0.75 [0.74-0.76] |
| MWI | 1995 | 0.18 [0.17-0.20] | 0.20 [0.20-0.21] | 0.53 [0.51-0.55] | 0.68 [0.67-0.69] |
| MWI | 2005 | 0.16 [0.15-0.17] | 0.15 [0.15-0.16] | 0.49 [0.47-0.51] | 0.61 [0.60-0.62] |
| MWI | 2015 | 0.14 [0.13-0.15] | 0.12 [0.11-0.13] | 0.45 [0.43-0.48] | 0.54 [0.53-0.56] |
| NAM | 1985 | 0.24 [0.21-0.27] | 0.09 [0.08-0.10] | 0.65 [0.62-0.68] | 0.48 [0.45-0.50] |
| NAM | 1995 | 0.23 [0.21-0.26] | 0.10 [0.09-0.11] | 0.65 [0.62-0.67] | 0.50 [0.48-0.52] |
| NAM | 2005 | 0.17 [0.15-0.18] | 0.08 [0.07-0.09] | 0.56 [0.54-0.58] | 0.46 [0.44-0.48] |
| NAM | 2015 | 0.11 [0.09-0.13] | 0.08 [0.07-0.09] | 0.45 [0.42-0.49] | 0.46 [0.44-0.49] |
| NER | 1985 | 0.08 [0.06-0.11] | 0.53 [0.50-0.56] | 0.32 [0.26-0.39] | 0.83 [0.81-0.84] |
| NER | 1995 | 0.04 [0.03-0.05] | 0.36 [0.34-0.38] | 0.20 [0.17-0.23] | 0.72 [0.71-0.74] |
| NER | 2005 | 0.02 [0.02-0.02] | 0.20 [0.19-0.21] | 0.11 [0.09-0.13] | 0.59 [0.57-0.60] |
| NER | 2015 | 0.01 [0.01-0.02] | 0.09 [0.07-0.10] | 0.06 [0.03-0.09] | 0.42 [0.39-0.44] |
| NGA | 1985 | 0.15 [0.13-0.16] | 0.26 [0.25-0.27] | 0.43 [0.41-0.46] | 0.62 [0.61-0.64] |
| NGA | 1995 | 0.10 [0.09-0.11] | 0.20 [0.19-0.21] | 0.33 [0.31-0.35] | 0.56 [0.55-0.57] |
| NGA | 2005 | 0.06 [0.05-0.06] | 0.18 [0.18-0.19] | 0.23 [0.22-0.24] | 0.53 [0.52-0.54] |
| NGA | 2015 | 0.03 [0.02-0.03] | 0.14 [0.13-0.15] | 0.13 [0.11-0.14] | 0.46 [0.45-0.48] |
| RWA | 1985 | 0.10 [0.09-0.11] | 0.05 [0.05-0.05] | 0.30 [0.27-0.32] | 0.25 [0.23-0.26] |
| RWA | 1995 | 0.08 [0.08-0.09] | 0.04 [0.04-0.04] | 0.26 [0.24-0.28] | 0.22 [0.21-0.23] |
| RWA | 2005 | 0.08 [0.07-0.08] | 0.03 [0.03-0.03] | 0.24 [0.22-0.25] | 0.17 [0.17-0.18] |
| RWA | 2015 | 0.08 [0.07-0.09] | 0.05 [0.04-0.05] | 0.25 [0.23-0.27] | 0.24 [0.23-0.25] |
| SDN | 1985 | 0.04 [0.03-0.05] | -                | 0.17 [0.14-0.19] | -                |
| SDN | 1995 | 0.04 [0.03-0.05] | -                | 0.15 [0.13-0.17] | -                |
| SDN | 2005 | 0.03 [0.03-0.04] | -                | 0.14 [0.12-0.16] | -                |
| SDN | 2015 | 0.04 [0.02-0.06] | -                | 0.15 [0.10-0.21] | -                |
| SEN | 1985 | 0.21 [0.18-0.23] | 0.24 [0.22-0.25] | 0.47 [0.43-0.50] | 0.56 [0.54-0.57] |
| SEN | 1995 | 0.14 [0.13-0.16] | 0.15 [0.14-0.16] | 0.37 [0.34-0.39] | 0.44 [0.43-0.46] |
| SEN | 2005 | 0.06 [0.06-0.07] | 0.12 [0.12-0.13] | 0.21 [0.20-0.23] | 0.41 [0.39-0.42] |
| SEN | 2015 | 0.03 [0.02-0.03] | 0.10 [0.09-0.11] | 0.11 [0.10-0.12] | 0.36 [0.34-0.37] |
| SLE | 1985 | 0.11 [0.10-0.14] | 0.24 [0.22-0.27] | 0.52 [0.47-0.57] | 0.74 [0.71-0.76] |
| SLE | 1995 | 0.11 [0.10-0.13] | 0.26 [0.24-0.27] | 0.52 [0.48-0.56] | 0.75 [0.73-0.77] |
| SLE | 2005 | 0.11 [0.10-0.12] | 0.23 [0.22-0.25] | 0.50 [0.48-0.53] | 0.73 [0.71-0.74] |
| SLE | 2015 | 0.07 [0.06-0.08] | 0.18 [0.17-0.19] | 0.40 [0.37-0.43] | 0.65 [0.63-0.67] |
| SSD | 1985 | -                | 0.14 [0.12-0.18] | -                | 0.57 [0.52-0.61] |
| SSD | 1995 | -                | 0.17 [0.14-0.20] | -                | 0.60 [0.56-0.64] |
| SSD | 2005 | -                | 0.17 [0.15-0.20] | -                | 0.61 [0.58-0.64] |
| SSD | 2015 | -                | 0.16 [0.11-0.23] | -                | 0.59 [0.51-0.68] |
| STP | 1985 | 0.19 [0.15-0.24] | 0.09 [0.07-0.12] | 0.62 [0.56-0.69] | 0.53 [0.46-0.59] |
| STP | 1995 | 0.18 [0.15-0.21] | 0.11 [0.08-0.13] | 0.61 [0.56-0.65] | 0.57 [0.52-0.62] |
| STP | 2005 | 0.17 [0.15-0.19] | 0.14 [0.12-0.17] | 0.60 [0.57-0.63] | 0.64 [0.60-0.68] |
| STP | 2015 | 0.15 [0.13-0.18] | 0.11 [0.08-0.13] | 0.57 [0.51-0.62] | 0.57 [0.52-0.63] |
| SWZ | 1985 | 0.08 [0.06-0.10] | 0.21 [0.17-0.24] | 0.38 [0.33-0.43] | 0.69 [0.65-0.72] |
| SWZ | 1995 | 0.07 [0.06-0.08] | 0.10 [0.09-0.12] | 0.35 [0.32-0.39] | 0.54 [0.51-0.57] |
| SWZ | 2005 | 0.05 [0.04-0.06] | 0.05 [0.04-0.05] | 0.30 [0.28-0.33] | 0.39 [0.37-0.42] |
| SWZ | 2015 | 0.05 [0.04-0.07] | 0.03 [0.02-0.03] | 0.31 [0.27-0.36] | 0.30 [0.25-0.34] |
| TCD | 1985 | 0.23 [0.19-0.27] | 0.35 [0.32-0.37] | 0.56 [0.52-0.61] | 0.76 [0.74-0.77] |

|     |      |                  |                  |                  |                  |
|-----|------|------------------|------------------|------------------|------------------|
| TCD | 1995 | 0.15 [0.13-0.18] | 0.31 [0.30-0.33] | 0.46 [0.42-0.49] | 0.74 [0.72-0.75] |
| TCD | 2005 | 0.08 [0.07-0.10] | 0.32 [0.31-0.34] | 0.33 [0.31-0.36] | 0.74 [0.73-0.75] |
| TCD | 2015 | 0.04 [0.04-0.05] | 0.33 [0.31-0.35] | 0.21 [0.19-0.24] | 0.75 [0.73-0.76] |
| TGO | 1985 | 0.07 [0.04-0.10] | 0.11 [0.09-0.14] | 0.29 [0.21-0.38] | 0.50 [0.45-0.56] |
| TGO | 1995 | 0.08 [0.06-0.11] | 0.12 [0.10-0.14] | 0.33 [0.27-0.40] | 0.52 [0.48-0.56] |
| TGO | 2005 | 0.09 [0.08-0.10] | 0.13 [0.12-0.14] | 0.35 [0.32-0.38] | 0.54 [0.51-0.56] |
| TGO | 2015 | 0.11 [0.09-0.14] | 0.13 [0.11-0.15] | 0.41 [0.35-0.47] | 0.54 [0.50-0.58] |
| TZA | 1985 | 0.08 [0.07-0.10] | 0.12 [0.11-0.13] | 0.34 [0.30-0.38] | 0.51 [0.49-0.53] |
| TZA | 1995 | 0.10 [0.09-0.12] | 0.12 [0.11-0.13] | 0.40 [0.37-0.43] | 0.50 [0.49-0.51] |
| TZA | 2005 | 0.12 [0.11-0.13] | 0.11 [0.10-0.11] | 0.44 [0.42-0.46] | 0.47 [0.46-0.49] |
| TZA | 2015 | 0.19 [0.17-0.21] | 0.17 [0.15-0.18] | 0.56 [0.52-0.59] | 0.58 [0.56-0.60] |
| UGA | 1985 | 0.15 [0.14-0.17] | 0.21 [0.20-0.22] | 0.53 [0.49-0.56] | 0.67 [0.66-0.69] |
| UGA | 1995 | 0.13 [0.12-0.14] | 0.19 [0.18-0.20] | 0.47 [0.45-0.50] | 0.64 [0.63-0.66] |
| UGA | 2005 | 0.13 [0.12-0.14] | 0.14 [0.13-0.15] | 0.49 [0.47-0.51] | 0.57 [0.56-0.58] |
| UGA | 2015 | 0.15 [0.13-0.17] | 0.16 [0.15-0.17] | 0.51 [0.48-0.55] | 0.61 [0.59-0.62] |
| ZAF | 1985 | 0.07 [0.06-0.08] | 0.03 [0.03-0.03] | 0.32 [0.29-0.34] | 0.27 [0.25-0.29] |
| ZAF | 1995 | 0.10 [0.09-0.11] | 0.05 [0.04-0.05] | 0.40 [0.38-0.42] | 0.34 [0.32-0.36] |
| ZAF | 2005 | 0.14 [0.13-0.16] | 0.07 [0.06-0.07] | 0.48 [0.46-0.50] | 0.41 [0.39-0.42] |
| ZAF | 2015 | 0.15 [0.13-0.17] | 0.06 [0.05-0.06] | 0.49 [0.47-0.52] | 0.37 [0.35-0.40] |
| ZMB | 1985 | 0.22 [0.20-0.24] | 0.17 [0.15-0.18] | 0.58 [0.56-0.61] | 0.62 [0.60-0.64] |
| ZMB | 1995 | 0.19 [0.18-0.21] | 0.17 [0.16-0.18] | 0.54 [0.52-0.56] | 0.62 [0.61-0.63] |
| ZMB | 2005 | 0.16 [0.15-0.17] | 0.14 [0.13-0.15] | 0.49 [0.47-0.51] | 0.58 [0.57-0.60] |
| ZMB | 2015 | 0.18 [0.17-0.20] | 0.15 [0.13-0.16] | 0.52 [0.50-0.55] | 0.59 [0.57-0.61] |
| ZWE | 1985 | 0.06 [0.05-0.07] | 0.11 [0.10-0.12] | 0.33 [0.30-0.36] | 0.52 [0.50-0.55] |
| ZWE | 1995 | 0.06 [0.05-0.06] | 0.07 [0.06-0.07] | 0.30 [0.28-0.32] | 0.42 [0.40-0.44] |
| ZWE | 2005 | 0.05 [0.05-0.05] | 0.05 [0.05-0.06] | 0.28 [0.27-0.30] | 0.38 [0.37-0.40] |
| ZWE | 2015 | 0.06 [0.05-0.07] | 0.05 [0.05-0.06] | 0.32 [0.29-0.35] | 0.38 [0.36-0.40] |

### Supplemental Table S3. Parameter estimates by country and sex

The probability density distribution can be generated from R using commands

```
remotes::install_github("kklot/ktools")
dskewlogis(ages, scale, shape, skew)
```

The estimates are for the birth cohort 2000, assuming the respondent's age at interview is 23. The numbers inside bracket are 95% uncertainty interval.

| Sex    | ISO_A3 | Scale                     | Shape                  | Skew                   |
|--------|--------|---------------------------|------------------------|------------------------|
| Male   | AGO    | 0.06144 [0.05966-0.06334] | 9.809 [ 9.401-10.277]  | 0.8868 [0.8122-0.9651] |
| Female | AGO    | 0.06621 [0.06472-0.06764] | 10.450 [10.208-10.714] | 1.9423 [1.7961-2.1047] |
| Male   | BDI    | 0.04196 [0.04088-0.04295] | 8.836 [ 8.580- 9.092]  | 0.7173 [0.6805-0.7582] |
| Female | BDI    | 0.05620 [0.05517-0.05720] | 6.834 [ 6.735- 6.929]  | 2.5787 [2.4554-2.7290] |
| Male   | BEN    | 0.05155 [0.05070-0.05243] | 8.915 [ 8.732- 9.108]  | 0.9966 [0.9490-1.0436] |
| Female | BEN    | 0.05632 [0.05581-0.05687] | 11.140 [11.004-11.286] | 0.9584 [0.9319-0.9863] |
| Male   | BFA    | 0.05150 [0.04920-0.05370] | 8.738 [ 8.448- 8.988]  | 1.7971 [1.6325-1.9847] |
| Female | BFA    | 0.05646 [0.05600-0.05694] | 12.158 [12.000-12.310] | 1.2064 [1.1694-1.2497] |
| Male   | BWA    | 0.05129 [0.04839-0.05387] | 8.146 [ 7.916- 8.397]  | 1.5573 [1.4341-1.6768] |
| Female | BWA    | 0.05332 [0.05142-0.05543] | 11.915 [11.629-12.225] | 1.3158 [1.2369-1.4025] |
| Male   | CAF    | 0.05730 [0.05626-0.05837] | 10.515 [10.190-10.871] | 1.1051 [1.0188-1.1950] |
| Female | CAF    | 0.06274 [0.06194-0.06350] | 10.943 [10.724-11.165] | 1.2363 [1.1719-1.3014] |
| Male   | CIV    | 0.05966 [0.05843-0.06086] | 8.013 [ 7.853- 8.205]  | 1.7769 [1.6530-1.8992] |
| Female | CIV    | 0.06125 [0.06064-0.06183] | 10.545 [10.398-10.685] | 1.4878 [1.4303-1.5463] |
| Male   | CMR    | 0.06021 [0.05924-0.06118] | 7.719 [ 7.599- 7.848]  | 2.1342 [2.0065-2.2666] |
| Female | CMR    | 0.06129 [0.06077-0.06183] | 10.036 [ 9.921-10.159] | 1.7052 [1.6407-1.7662] |
| Male   | COD    | 0.06295 [0.06178-0.06411] | 8.236 [ 8.062- 8.420]  | 1.6221 [1.5269-1.7275] |
| Female | COD    | 0.06301 [0.06251-0.06354] | 9.259 [ 9.166- 9.352]  | 1.5266 [1.4834-1.5705] |
| Male   | COG    | 0.06024 [0.05873-0.06181] | 9.930 [ 9.681-10.210]  | 1.2087 [1.1279-1.2865] |
| Female | COG    | 0.06165 [0.06082-0.06246] | 12.020 [11.833-12.200] | 1.2586 [1.2124-1.3086] |
| Male   | COM    | 0.05956 [0.05615-0.06325] | 6.480 [ 6.094- 6.861]  | 1.9575 [1.6375-2.4016] |
| Female | COM    | 0.06696 [0.06171-0.07261] | 4.679 [ 4.478- 4.875]  | 3.7076 [3.0301-4.5790] |
| Male   | ERI    | 0.05585 [0.05179-0.06049] | 5.364 [ 5.124- 5.644]  | 3.1957 [2.5671-3.9282] |
| Female | ERI    | 0.06903 [0.06279-0.07578] | 4.891 [ 4.754- 5.052]  | 4.3119 [3.5718-5.1627] |
| Male   | ETH    | 0.05198 [0.05084-0.05319] | 6.648 [ 6.545- 6.765]  | 2.0375 [1.9099-2.1555] |
| Female | ETH    | 0.06235 [0.06164-0.06306] | 6.127 [ 6.076- 6.179]  | 2.4408 [2.3697-2.5151] |
| Male   | GAB    | 0.06044 [0.05820-0.06249] | 9.570 [ 9.225- 9.897]  | 1.2126 [1.1086-1.3292] |
| Female | GAB    | 0.06009 [0.05854-0.06170] | 13.066 [12.747-13.402] | 1.1509 [1.0755-1.2286] |
| Male   | GHA    | 0.05346 [0.05246-0.05459] | 8.368 [ 8.187- 8.552]  | 1.2789 [1.2149-1.3498] |
| Female | GHA    | 0.05599 [0.05543-0.05662] | 9.890 [ 9.772-10.016]  | 1.1927 [1.1548-1.2301] |
| Male   | GIN    | 0.05337 [0.05214-0.05473] | 7.778 [ 7.533- 8.015]  | 1.5736 [1.4381-1.7263] |
| Female | GIN    | 0.06622 [0.06535-0.06716] | 8.412 [ 8.288- 8.541]  | 2.4490 [2.3039-2.6052] |
| Male   | GMB    | 0.05130 [0.04987-0.05275] | 6.454 [ 6.234- 6.673]  | 1.3440 [1.2336-1.4617] |
| Female | GMB    | 0.06103 [0.06008-0.06198] | 6.692 [ 6.609- 6.784]  | 2.7304 [2.5984-2.8821] |
| Male   | GNB    | 0.05560 [0.05405-0.05713] | 9.799 [ 9.410-10.219]  | 1.2411 [1.1185-1.3766] |
| Female | GNB    | 0.06064 [0.05991-0.06134] | 12.616 [12.392-12.858] | 1.4185 [1.3465-1.4929] |
| Male   | KEN    | 0.05441 [0.05312-0.05577] | 7.943 [ 7.797- 8.084]  | 0.9489 [0.9151-0.9876] |
| Female | KEN    | 0.05759 [0.05711-0.05805] | 8.972 [ 8.886- 9.053]  | 1.2285 [1.1985-1.2570] |
| Male   | LBR    | 0.05808 [0.05627-0.05975] | 11.400 [11.047-11.738] | 1.2746 [1.1770-1.3865] |
| Female | LBR    | 0.06416 [0.06294-0.06536] | 14.470 [14.157-14.815] | 1.4229 [1.3333-1.5187] |
| Male   | LSO    | 0.06859 [0.06703-0.07022] | 6.959 [ 6.804- 7.112]  | 3.1128 [2.8091-3.4291] |

| Sex    | ISO_A3 | Scale                     | Shape                  | Skew                   |
|--------|--------|---------------------------|------------------------|------------------------|
| Female | LSO    | 0.05747 [0.05662-0.05835] | 10.134 [ 9.961-10.316] | 1.8845 [1.7792-1.9936] |
| Male   | MDG    | 0.05977 [0.05894-0.06059] | 11.675 [11.405-11.956] | 1.3784 [1.2929-1.4524] |
| Female | MDG    | 0.06449 [0.06361-0.06528] | 10.005 [ 9.862-10.147] | 1.5449 [1.4867-1.6066] |
| Male   | MLI    | 0.05316 [0.05207-0.05426] | 7.740 [ 7.575- 7.908]  | 1.7005 [1.5971-1.8240] |
| Female | MLI    | 0.06333 [0.06284-0.06389] | 9.344 [ 9.261- 9.423]  | 1.8333 [1.7858-1.8860] |
| Male   | MOZ    | 0.06002 [0.05872-0.06124] | 11.218 [10.895-11.521] | 1.2065 [1.1222-1.3026] |
| Female | MOZ    | 0.06204 [0.06127-0.06292] | 10.768 [10.606-10.939] | 1.2926 [1.2410-1.3477] |
| Male   | MWI    | 0.05424 [0.05359-0.05493] | 8.956 [ 8.815- 9.102]  | 0.9820 [0.9459-1.0169] |
| Female | MWI    | 0.05757 [0.05724-0.05790] | 10.970 [10.879-11.060] | 1.1881 [1.1647-1.2135] |
| Male   | NAM    | 0.05907 [0.05800-0.06014] | 8.389 [ 8.204- 8.571]  | 1.6809 [1.5805-1.7905] |
| Female | NAM    | 0.06206 [0.06117-0.06289] | 8.746 [ 8.617- 8.889]  | 2.3921 [2.2597-2.5345] |
| Male   | NER    | 0.04325 [0.04098-0.04572] | 7.492 [ 7.184- 7.822]  | 1.4280 [1.2766-1.6069] |
| Female | NER    | 0.06887 [0.06755-0.07022] | 6.797 [ 6.698- 6.890]  | 4.1789 [3.8860-4.4995] |
| Male   | NGA    | 0.04777 [0.04706-0.04852] | 6.657 [ 6.561- 6.737]  | 1.5690 [1.5155-1.6345] |
| Female | NGA    | 0.06107 [0.06063-0.06154] | 7.154 [ 7.108- 7.196]  | 1.8696 [1.8337-1.9090] |
| Male   | RWA    | 0.04672 [0.04611-0.04738] | 8.173 [ 8.012- 8.335]  | 0.8546 [0.8213-0.8909] |
| Female | RWA    | 0.05187 [0.05135-0.05237] | 8.143 [ 8.055- 8.236]  | 1.4142 [1.3725-1.4541] |
| Male   | SDN    | 0.05789 [0.05281-0.06321] | 4.422 [ 4.220- 4.658]  | 3.1672 [2.5597-3.9256] |
| Male   | SEN    | 0.04662 [0.04556-0.04777] | 5.515 [ 5.411- 5.621]  | 1.6979 [1.6083-1.8078] |
| Female | SEN    | 0.06596 [0.06511-0.06679] | 5.681 [ 5.632- 5.733]  | 3.2001 [3.0684-3.3223] |
| Male   | SLE    | 0.05408 [0.05336-0.05476] | 11.392 [11.151-11.616] | 1.0549 [1.0058-1.1077] |
| Female | SLE    | 0.05833 [0.05785-0.05878] | 12.055 [11.930-12.202] | 0.9570 [0.9332-0.9803] |
| Female | SSD    | 0.06376 [0.06131-0.06636] | 8.805 [ 8.547- 9.087]  | 1.9904 [1.8042-2.1964] |
| Male   | STP    | 0.05786 [0.05652-0.05921] | 10.323 [ 9.916-10.722] | 1.1257 [1.0360-1.2314] |
| Female | STP    | 0.05842 [0.05727-0.05959] | 11.896 [11.487-12.270] | 1.2748 [1.1685-1.3863] |
| Male   | SWZ    | 0.05682 [0.05549-0.05817] | 8.080 [ 7.861- 8.298]  | 1.9013 [1.7531-2.0621] |
| Female | SWZ    | 0.05756 [0.05648-0.05869] | 9.449 [ 9.261- 9.667]  | 2.2712 [2.1002-2.4472] |
| Male   | TCD    | 0.05505 [0.05355-0.05662] | 6.421 [ 6.242- 6.602]  | 2.1292 [1.9258-2.3413] |
| Female | TCD    | 0.06898 [0.06827-0.06968] | 8.527 [ 8.434- 8.629]  | 1.9760 [1.9095-2.0510] |
| Male   | TGO    | 0.05384 [0.05228-0.05553] | 9.303 [ 8.921- 9.674]  | 1.0479 [0.9590-1.1414] |
| Female | TGO    | 0.05709 [0.05611-0.05804] | 10.785 [10.557-11.012] | 1.1132 [1.0585-1.1742] |
| Male   | TZA    | 0.05916 [0.05809-0.06021] | 8.502 [ 8.341- 8.681]  | 1.2660 [1.2019-1.3288] |
| Female | TZA    | 0.06304 [0.06251-0.06361] | 8.572 [ 8.495- 8.647]  | 1.8681 [1.8179-1.9205] |
| Male   | UGA    | 0.05720 [0.05642-0.05810] | 9.268 [ 9.121- 9.425]  | 1.1711 [1.1246-1.2178] |
| Female | UGA    | 0.05988 [0.05946-0.06032] | 10.246 [10.148-10.339] | 1.3173 [1.2881-1.3486] |
| Male   | ZAF    | 0.06162 [0.06075-0.06248] | 7.371 [ 7.272- 7.466]  | 1.8528 [1.7817-1.9232] |
| Female | ZAF    | 0.05959 [0.05894-0.06024] | 8.524 [ 8.428- 8.616]  | 2.2448 [2.1683-2.3206] |
| Male   | ZMB    | 0.05694 [0.05618-0.05765] | 8.457 [ 8.329- 8.576]  | 1.0851 [1.0483-1.1241] |
| Female | ZMB    | 0.06255 [0.06199-0.06313] | 9.385 [ 9.278- 9.487]  | 1.8533 [1.7859-1.9234] |
| Male   | ZWE    | 0.05479 [0.05404-0.05553] | 8.614 [ 8.482- 8.741]  | 1.5059 [1.4459-1.5723] |
| Female | ZWE    | 0.05892 [0.05830-0.05956] | 8.986 [ 8.881- 9.095]  | 2.0978 [2.0140-2.1883] |

**Supplemental Table S4. ISO A3 and country names of sub-Saharan Africa**

| <b>Name</b>                       | <b>ISO_A3 Subregion</b> |                 |
|-----------------------------------|-------------------------|-----------------|
| Angola                            | AGO                     | Middle Africa   |
| Benin                             | BEN                     | Western Africa  |
| Botswana                          | BWA                     | Southern Africa |
| Burkina Faso                      | BFA                     | Western Africa  |
| Burundi                           | BDI                     | Eastern Africa  |
| Cabo Verde*                       | CPV                     | Western Africa  |
| Cameroon                          | CMR                     | Middle Africa   |
| Central African Republic          | CAF                     | Middle Africa   |
| Chad                              | TCD                     | Middle Africa   |
| Comoros                           | COM                     | Eastern Africa  |
| Congo                             | COG                     | Middle Africa   |
| Congo, Democratic Republic of the | COD                     | Middle Africa   |
| Cote d'Ivoire                     | CIV                     | Western Africa  |
| Djibouti*                         | DJI                     | Eastern Africa  |
| Equatorial Guinea*                | GNQ                     | Middle Africa   |
| Eritrea                           | ERI                     | Eastern Africa  |
| Eswatini                          | SWZ                     | Southern Africa |
| Ethiopia                          | ETH                     | Eastern Africa  |
| Gabon                             | GAB                     | Middle Africa   |
| Gambia                            | GMB                     | Western Africa  |
| Ghana                             | GHA                     | Western Africa  |
| Guinea                            | GIN                     | Western Africa  |
| Guinea-Bissau                     | GNB                     | Western Africa  |
| Kenya                             | KEN                     | Eastern Africa  |
| Lesotho                           | LSO                     | Southern Africa |
| Liberia                           | LBR                     | Western Africa  |
| Madagascar                        | MDG                     | Eastern Africa  |
| Malawi                            | MWI                     | Eastern Africa  |
| Mali                              | MLI                     | Western Africa  |
| Mauritania*                       | MRT                     | Western Africa  |
| Mauritius*                        | MUS                     | Eastern Africa  |
| Mozambique                        | MOZ                     | Eastern Africa  |
| Namibia                           | NAM                     | Southern Africa |
| Niger                             | NER                     | Western Africa  |
| Nigeria                           | NGA                     | Western Africa  |
| Rwanda                            | RWA                     | Eastern Africa  |
| Sao Tome and Principe             | STP                     | Middle Africa   |
| Senegal                           | SEN                     | Western Africa  |
| Seychelles*                       | SYC                     | Eastern Africa  |
| Sierra Leone                      | SLE                     | Western Africa  |
| Somalia*                          | SOM                     | Eastern Africa  |
| South Africa                      | ZAF                     | Southern Africa |
| South Sudan                       | SSD                     | Eastern Africa  |
| Sudan                             | SDN                     | Eastern Africa  |
| Tanzania, United Republic of      | TZA                     | Eastern Africa  |
| Togo                              | TGO                     | Western Africa  |
| Uganda                            | UGA                     | Eastern Africa  |
| Zambia                            | ZMB                     | Eastern Africa  |
| Zimbabwe                          | ZWE                     | Eastern Africa  |

\* Omitted from analysis due to no available surveys.
